# Supplementary material
Source: PubMed Central journal article supplement (PMC5859994)
Supplement: kww104yuanwebmaterial.pdf [file kww104yuanwebmaterial.pdf]

**Web Table 1. Subject characteristics for women in the original NHS/NHSII cohorts, women who were invited, responded and agreed to participate, and women who were included in the final analysis.**

| Variables, Mean (SD)         | NHS1 (1976-2012) |                                   |                                     |                        |                                       | NHS2 (1989-2011) |                                   |                                     |                        |                                       |
|------------------------------|------------------|-----------------------------------|-------------------------------------|------------------------|---------------------------------------|------------------|-----------------------------------|-------------------------------------|------------------------|---------------------------------------|
|                              | Original cohort  | Invited <sup>a</sup> participants | Responded <sup>b</sup> participants | Consented participants | Final study <sup>c</sup> participants | Original cohort  | Invited <sup>a</sup> participants | Responded <sup>b</sup> participants | Consented participants | Final study <sup>c</sup> participants |
| <b>Number</b>                | 121,701          | 3,313                             | 1,229                               | 359                    | 272                                   | 116,671          | 2,190                             | 1,194                               | 437                    | 360                                   |
| <b>Age, years</b>            |                  |                                   |                                     |                        |                                       |                  |                                   |                                     |                        |                                       |
| <b>Original baseline</b>     | 42.9 (7.3)       | 37.3 (4.6)                        | 36.8 (4.4)                          | 37.2 (4.4)             | 36.9 (4.3)                            | 34.5 (4.7)       | 34.7 (5.0)                        | 34.4 (5.1)                          | 33.9 (5.2)             | 33.8 (5.2)                            |
| <b>WLVS enrollment</b>       | 77.9 (15.1)      | 72.3 (4.6)                        | 71.8 (4.4)                          | 71.2 (4.4)             | 70.9 (4.3)                            | 56.3 (4.7)       | 56.5 (5.0)                        | 56.2 (5.1)                          | 54.4 (5.2)             | 54.3 (5.2)                            |
| <b>Height, m</b>             | 1.64 (0.06)      | 1.64 (0.06)                       | 1.64 (0.06)                         | 1.62 (0.06)            | 1.62 (0.06)                           | 1.65 (0.07)      | 1.65 (0.07)                       | 1.65 (0.07)                         | 1.66 (0.07)            | 1.66 (0.07)                           |
| <b>BMI, kg/m<sup>2</sup></b> |                  |                                   |                                     |                        |                                       |                  |                                   |                                     |                        |                                       |
| <b>Original baseline</b>     | 23.6 (4.7)       | 22.5 (3.9)                        | 22.1 (3.5)                          | 21.6 (3.1)             | 21.5 (3.3)                            | 24.1 (5.1)       | 24.5 (5.1)                        | 24.1 (4.9)                          | 23.2 (4.2)             | 23.1 (4.2)                            |
| <b>WLVS enrollment</b>       | 26.2 (5.4)       | 26.3 (5.1)                        | 26.0 (4.9)                          | 26.0 (4.8)             | 26.2 (4.8)                            | 27.7 (6.4)       | 28.3 (6.6)                        | 28.0 (6.7)                          | 26.7 (5.7)             | 26.8 (5.8)                            |
| <b>Current smokers, %</b>    |                  |                                   |                                     |                        |                                       |                  |                                   |                                     |                        |                                       |
| <b>Original baseline</b>     | 33.1             | 23.0                              | 22.9                                | 25.6                   | 25.4                                  | 13.5             | 10.4                              | 10.5                                | 8.0                    | 8.1                                   |
| <b>WLVS enrollment</b>       | 4.8              | 2.7                               | 2.2                                 | 1.2                    | 1.1                                   | 5.3              | 4.4                               | 3.8                                 | 3.5                    | 2.5                                   |
| <b>White, %</b>              | 93.7             | 85.7                              | 92.8                                | 95.0                   | 96.0                                  | 92.4             | 63.1                              | 77.1                                | 86.3                   | 86.1                                  |

Abbreviations: SD, standard deviation; NHS, Nurses' Health Study; BMI, body mass index.

<sup>a</sup> The percentage of white population was low in the invited participants as we tried to oversample African-Americans so this ethnic group would comprise approximately 25% of participants from both NHS & NHSII cohorts.

<sup>b</sup> The large decrease between responded and consented was in part due to lack of broadband and other inclusion and exclusions criterions. Inclusion criteria: women who had completed the 2006/2007 cohort SFFQ, had previously provided blood samples, had access to broadband internet, and were not planning to make substantial changes in their diet nor their physical activity levels. Women with medical history of coronary heart disease, stroke, cancer, or major neurological disease were excluded. Among responded participants, about 62% were interested and eligible to participant in the study.

<sup>c</sup> A small group of women in WLVS had participated in previous validations in 1980 (N=13) or 1986 (N=19).

**Web Table 2: Mean Absolute Daily Nutrient Intakes Estimated by SFFQs, Averaged 7DDRs, and Averaged ASA24s, Nutrients Not Included in the Main Table 2 (Data Provided by 632 U.S. Female Nurses Aged 45-80 Years, 2010-2012)**

| Nutrient                                  | SFFQ2 |        | SFFQ1 |        | WebFFQ |        | 7DDRs |        | ASA24s |        |
|-------------------------------------------|-------|--------|-------|--------|--------|--------|-------|--------|--------|--------|
|                                           | Mean  | SD     | Mean  | SD     | Mean   | SD     | Mean  | SD     | Mean   | SD     |
| Butyric FA (g)                            | 0.46  | (0.28) | 0.47  | (0.29) | 0.45   | (0.26) | 0.54  | (0.28) | 0.62   | (0.43) |
| Capric FA (g)                             | 0.36  | (0.21) | 0.37  | (0.21) | 0.35   | (0.2)  | 0.47  | (0.25) | 0.51   | (0.35) |
| Caproic FA (g)                            | 0.24  | (0.15) | 0.24  | (0.16) | 0.23   | (0.14) | 0.27  | (0.16) | 0.32   | (0.22) |
| Caprylic FA (g)                           | 0.18  | (0.11) | 0.18  | (0.11) | 0.17   | (0.1)  | 0.27  | (0.17) | 0.27   | (0.20) |
| Gadoleic FA (g)                           | 0.24  | (0.12) | 0.25  | (0.13) | 0.23   | (0.12) | 0.21  | (0.09) | 0.21   | (0.12) |
| Myristic FA (g)                           | 1.7   | (0.9)  | 1.8   | (0.9)  | 1.7    | (0.8)  | 2.1   | (0.9)  | 2.2    | (1.3)  |
| Palmitic FA (g)                           | 12.3  | (4.5)  | 12.6  | (4.6)  | 11.8   | (4.4)  | 11.6  | (3.5)  | 12.8   | (5.1)  |
| Palmitoleic FA (g)                        | 1.0   | (0.4)  | 1.0   | (0.4)  | 1.0    | (0.4)  | 1.0   | (0.4)  | 1.1    | (0.5)  |
| Stearic FA (g)                            | 5.5   | (2.4)  | 5.6   | (2.4)  | 5.3    | (2.3)  | 5.3   | (1.8)  | 6.2    | (3.0)  |
| Total folate (mcg)                        | 458   | (181)  | 478   | (170)  | 443    | (159)  | 388   | (122)  | 376    | (147)  |
| With supplements                          | 743   | (355)  | 772   | (323)  | 722    | (308)  | 671   | (366)  |        |        |
| Alpha carotene with supplements (mcg)     | 855   | (766)  | 920   | (872)  | 850    | (767)  | 611   | (489)  |        |        |
| Lutein-zeaxanthin with supplements (mcg)  | 3925  | (3178) | 3877  | (2638) | 3818   | (2523) | 2702  | (2788) |        |        |
| Lycopene with supplements (mcg)           | 5602  | (3980) | 5743  | (4487) | 5713   | (4610) | 4976  | (3565) |        |        |
| Beta cryptoxanthin with supplements (mcg) | 111   | (96)   | 120   | (103)  | 107    | (94)   | 154   | (181)  |        |        |

Abbreviations: SD, standard deviation; FA, fatty acid; SFFQ, The semi-quantitative food frequency questionnaire; WebFFQ: web-based version of the SFFQ; 7DDr, 7 Day Dietary Records; ASA24, Web-based, automated-self-administered 24-hour dietary recall.

**Web Table 3: Rank Intraclass Correlations of SFFQ, 7DDR and ASA24, Nutrients Not Included in the Main Table 3 (Data Provided by 632 U.S. Female Nurses Aged 45-80 Years, 2010-2012)**

| Nutrient                                  | SFFQ        |                |                 | 7DDR        |                |                 | ASA24       |                |                 |
|-------------------------------------------|-------------|----------------|-----------------|-------------|----------------|-----------------|-------------|----------------|-----------------|
|                                           | Un-adjusted | Energy density | Residual method | Un-adjusted | Energy density | Residual method | Un-adjusted | Energy density | Residual method |
| Butyric FA (g)                            | 0.66        | 0.62           | 0.61            | 0.59        | 0.55           | 0.53            | 0.25        | 0.22           | 0.19            |
| Capric FA (g)                             | 0.68        | 0.65           | 0.65            | 0.58        | 0.53           | 0.52            | 0.26        | 0.23           | 0.21            |
| Caproic FA (g)                            | 0.67        | 0.63           | 0.63            | 0.59        | 0.56           | 0.55            | 0.26        | 0.23           | 0.21            |
| Caprylic FA (g)                           | 0.66        | 0.64           | 0.64            | 0.54        | 0.49           | 0.48            | 0.23        | 0.20           | 0.18            |
| Gadoleic FA (g)                           | 0.64        | 0.60           | 0.60            | 0.44        | 0.38           | 0.38            | 0.15        | 0.11           | 0.11            |
| Myristic FA (g)                           | 0.68        | 0.64           | 0.64            | 0.61        | 0.57           | 0.55            | 0.25        | 0.21           | 0.19            |
| Palmitic FA (g)                           | 0.71        | 0.68           | 0.68            | 0.65        | 0.66           | 0.65            | 0.28        | 0.25           | 0.25            |
| Palmitoleic FA (g)                        | 0.68        | 0.61           | 0.61            | 0.62        | 0.58           | 0.58            | 0.24        | 0.22           | 0.21            |
| Stearic FA (g)                            | 0.70        | 0.70           | 0.70            | 0.64        | 0.64           | 0.64            | 0.27        | 0.25           | 0.24            |
| Total folate (mcg)                        | 0.62        | 0.59           | 0.58            | 0.61        | 0.58           | 0.58            | 0.25        | 0.22           | 0.22            |
| With supplements                          | 0.65        | 0.65           | 0.64            | 0.74        | 0.72           | 0.74            |             |                |                 |
| Alpha carotene with supplements (mcg)     | 0.69        | 0.65           | 0.65            | 0.37        | 0.37           | 0.37            |             |                |                 |
| Lutein-zeaxanthin with supplements (mcg)  | 0.71        | 0.69           | 0.69            | 0.52        | 0.51           | 0.52            |             |                |                 |
| Lycopene with supplements (mcg)           | 0.63        | 0.56           | 0.56            | 0.24        | 0.23           | 0.23            |             |                |                 |
| Beta cryptoxanthin with supplements (mcg) | 0.74        | 0.72           | 0.72            | 0.31        | 0.31           | 0.31            |             |                |                 |

Abbreviations: SD, standard deviation; FA, fatty acid; SFFQ, The semi-quantitative food frequency questionnaire; 7DDR, 7 Day Dietary Records; ASA24, Web-based, automated-self-administered 24-hour dietary recall.

**Web Table 4: Spearman Correlation Coefficient for Comparison of Daily Nutrient Intake From SFFQ2 with 7DDRs, and ASA24s, Unadjusted and Energy-adjusted Using Energy Density and Residual Method, Nutrients Not Included in the Main Table 4 (Data Provided by 632 U.S. Female Nurses Aged 45-80 Years, 2010-2012)**

| Nutrient                                  | SFFQ2 vs. 7DDRs |                 |                 |                                 |              |      | SFFQ2 vs. ASA24s |                 |                 |                                 |              |      |
|-------------------------------------------|-----------------|-----------------|-----------------|---------------------------------|--------------|------|------------------|-----------------|-----------------|---------------------------------|--------------|------|
|                                           | Un-adjusted     | Energy-adjusted |                 |                                 |              | ICC  | Un-adjusted      | Energy-adjusted |                 |                                 |              | ICC  |
|                                           |                 | Energy density  | Residual method | De-attenuated ( $\rho$ & 95%CI) |              |      |                  | Energy density  | Residual method | De-attenuated ( $\rho$ & 95%CI) |              |      |
| Butyric FA (g)                            | 0.53            | 0.55            | 0.52            | 0.63                            | (0.55, 0.69) | 0.53 | 0.45             | 0.44            | 0.39            | 0.60                            | (0.47, 0.69) | 0.19 |
| Capric FA (g)                             | 0.48            | 0.50            | 0.48            | 0.58                            | (0.50, 0.64) | 0.52 | 0.42             | 0.40            | 0.37            | 0.56                            | (0.44, 0.65) | 0.21 |
| Caproic FA (g)                            | 0.55            | 0.56            | 0.53            | 0.63                            | (0.56, 0.69) | 0.55 | 0.48             | 0.47            | 0.42            | 0.63                            | (0.52, 0.72) | 0.21 |
| Caprylic FA (g)                           | 0.42            | 0.42            | 0.41            | 0.50                            | (0.41, 0.57) | 0.48 | 0.39             | 0.35            | 0.32            | 0.51                            | (0.38, 0.61) | 0.18 |
| Gadoleic FA (g)                           | 0.26            | 0.33            | 0.33            | 0.44                            | (0.35, 0.53) | 0.38 | 0.16             | 0.23            | 0.24            | 0.45                            | (0.30, 0.59) | 0.11 |
| Myristic FA (g)                           | 0.48            | 0.52            | 0.51            | 0.60                            | (0.53, 0.67) | 0.55 | 0.44             | 0.43            | 0.42            | 0.65                            | (0.53, 0.74) | 0.19 |
| Palmitic FA (g)                           | 0.42            | 0.62            | 0.62            | 0.70                            | (0.64, 0.74) | 0.65 | 0.42             | 0.59            | 0.56            | 0.74                            | (0.63, 0.82) | 0.25 |
| Palmitoleic FA (g)                        | 0.41            | 0.51            | 0.51            | 0.58                            | (0.51, 0.65) | 0.58 | 0.36             | 0.43            | 0.43            | 0.64                            | (0.53, 0.72) | 0.21 |
| Stearic FA (g)                            | 0.43            | 0.59            | 0.60            | 0.68                            | (0.61, 0.73) | 0.64 | 0.44             | 0.55            | 0.51            | 0.70                            | (0.60, 0.79) | 0.24 |
| Total folate                              | 0.44            | 0.54            | 0.55            | 0.63                            | (0.56, 0.69) | 0.58 | 0.35             | 0.41            | 0.41            | 0.57                            | (0.46, 0.66) | 0.22 |
| With supplements                          | 0.66            | 0.69            | 0.70            | 0.76                            | (0.71, 0.80) | 0.74 |                  |                 |                 |                                 |              |      |
| Alpha carotene with supplements (mcg)     | 0.49            | 0.48            | 0.47            | 0.64                            | (0.54, 0.71) | 0.37 |                  |                 |                 |                                 |              |      |
| Lutein-zeaxanthin with supplements (mcg)  | 0.51            | 0.53            | 0.52            | 0.63                            | (0.56, 0.70) | 0.52 |                  |                 |                 |                                 |              |      |
| Lycopene with supplements (mcg)           | 0.40            | 0.38            | 0.37            | 0.61                            | (0.45, 0.72) | 0.23 |                  |                 |                 |                                 |              |      |
| Beta cryptoxanthin with supplements (mcg) | 0.36            | 0.38            | 0.38            | 0.55                            | (0.43, 0.64) | 0.31 |                  |                 |                 |                                 |              |      |
| Alcohol intake <sup>a</sup>               | 0.86            | N/A             | N/A             | 0.91                            | (0.89, 0.93) | 0.81 | 0.75             | N/A             | N/A             | 0.84                            | (0.78, 0.88) | 0.47 |

Abbreviations: CI, confidence interval; ICC, intra class correlation; FA, fatty acid; SFFQ, The semi-quantitative food frequency questionnaire; 7DDR, 7 Day Dietary Records; ASA24, Web-based, automated-self-administered 24-hour dietary recall.

<sup>a</sup>Alcohol intake usually didn't adjust for energy intake in most epidemiologic studies; therefore this table presented the unadjusted and de-attenuated spearman correlation coefficient for alcohol intake.

**Web Table 5: Pearson Correlation Coefficient for Comparison of Daily Nutrient Intake From SFFQ2 with Averaged 7DDRs, and Averaged ASA24s, Unadjusted and Energy-adjusted (Data Provided by 632 U.S. Female Nurses Aged 45-80 Years, 2010-2012)**

| Nutrient                     | SFFQ2 vs. 7DDR |                 |                 |                                 |              | SFFQ2 vs. ASA24 |                 |                 |                                 |      |              |      |
|------------------------------|----------------|-----------------|-----------------|---------------------------------|--------------|-----------------|-----------------|-----------------|---------------------------------|------|--------------|------|
|                              | Un-adjusted    | Energy-adjusted |                 |                                 |              | Un-adjusted     | Energy-adjusted |                 |                                 |      |              |      |
|                              |                | Energy density  | Residual method | De-attenuated ( $\rho$ & 95%CI) | ICC          |                 | Energy density  | Residual method | De-attenuated ( $\rho$ & 95%CI) | ICC  |              |      |
| Total energy (kcal)          | 0.30           |                 | 0.33            | (0.25, 0.41)                    | 0.64         | 0.32            |                 | 0.43            | (0.33, 0.52)                    | 0.30 |              |      |
| Total fat (g)                | 0.37           | 0.62            | 0.60            | 0.68                            | (0.62, 0.73) | 0.67            | 0.35            | 0.58            | 0.56                            | 0.77 | (0.64, 0.85) | 0.22 |
| Saturated fat (g)            | 0.46           | 0.63            | 0.63            | 0.70                            | (0.65, 0.75) | 0.67            | 0.46            | 0.55            | 0.58                            | 0.74 | (0.63, 0.82) | 0.25 |
| Polyunsaturated fat (g)      | 0.30           | 0.47            | 0.49            | 0.60                            | (0.52, 0.67) | 0.50            | 0.25            | 0.44            | 0.44                            | 0.74 | (0.55, 0.86) | 0.13 |
| Monounsaturated fat (g)      | 0.39           | 0.52            | 0.51            | 0.59                            | (0.52, 0.65) | 0.61            | 0.32            | 0.43            | 0.42                            | 0.63 | (0.51, 0.73) | 0.20 |
| Arachadonic FA (g)           | 0.43           | 0.39            | 0.48            | 0.57                            | (0.49, 0.64) | 0.54            | 0.31            | 0.29            | 0.36                            | 0.49 | (0.32, 0.63) | 0.14 |
| Lauric FA (g)                | 0.36           | 0.30            | 0.37            | 0.47                            | (0.37, 0.55) | 0.45            | 0.35            | 0.15            | 0.33                            | 0.48 | (0.36, 0.59) | 0.21 |
| Linoleic FA (g)              | 0.31           | 0.45            | 0.47            | 0.58                            | (0.49, 0.65) | 0.50            | 0.26            | 0.43            | 0.44                            | 0.75 | (0.56, 0.87) | 0.12 |
| Linolenic FA (g)             | 0.38           | 0.57            | 0.52            | 0.64                            | (0.56, 0.71) | 0.50            | 0.29            | 0.41            | 0.37                            | 0.61 | (0.46, 0.72) | 0.15 |
| N-3 (DHA+EPA) FA (g)         | 0.54           | 0.43            | 0.54            | 0.70                            | (0.61, 0.77) | 0.44            | 0.24            | 0.30            | 0.28                            | 0.57 | (0.32, 0.75) | 0.08 |
| With supplements             | 0.65           | 0.46            | 0.64            | 0.73                            | (0.67, 0.79) | 0.61            |                 |                 |                                 |      |              |      |
| Oleic FA (g)                 | 0.39           | 0.51            | 0.50            | 0.58                            | (0.51, 0.64) | 0.60            | 0.32            | 0.42            | 0.41                            | 0.63 | (0.50, 0.73) | 0.19 |
| Cholesterol (mg)             | 0.52           | 0.56            | 0.58            | 0.68                            | (0.61, 0.74) | 0.59            | 0.40            | 0.40            | 0.42                            | 0.73 | (0.57, 0.84) | 0.14 |
| Protein (g)                  | 0.34           | 0.50            | 0.50            | 0.56                            | (0.48, 0.62) | 0.63            | 0.31            | 0.39            | 0.39                            | 0.56 | (0.45, 0.66) | 0.22 |
| Carbohydrate (g)             | 0.44           | 0.69            | 0.71            | 0.75                            | (0.70, 0.79) | 0.78            | 0.46            | 0.61            | 0.65                            | 0.78 | (0.71, 0.84) | 0.39 |
| Total sugar (g)              | 0.56           | 0.69            | 0.71            | 0.77                            | (0.73, 0.81) | 0.77            | 0.56            | 0.64            | 0.64                            | 0.77 | (0.70, 0.83) | 0.38 |
| Fiber (g)                    | 0.48           | 0.64            | 0.64            | 0.68                            | (0.62, 0.73) | 0.75            | 0.42            | 0.53            | 0.53                            | 0.67 | (0.58, 0.75) | 0.32 |
| Alcohol (g)                  | 0.73           | 0.83            | 0.72            | 0.82                            | (0.77, 0.86) | 0.65            | 0.60            | 0.75            | 0.59                            | 0.67 | (0.61, 0.73) | 0.51 |
| Retinol activity eqvts (mcg) | 0.45           | 0.32            | 0.49            | 0.68                            | (0.57, 0.76) | 0.35            | 0.39            | 0.51            | 0.41                            | 0.59 | (0.47, 0.69) | 0.21 |
| With supplements             | 0.66           | 0.42            | 0.65            | 0.74                            | (0.68, 0.79) | 0.63            |                 |                 |                                 |      |              |      |
| Alpha carotene (mcg)         | 0.51           | 0.34            | 0.50            | 0.69                            | (0.58, 0.78) | 0.35            | 0.33            | 0.74            | 0.32                            | 0.61 | (0.44, 0.75) | 0.11 |
| Beta carotene (mcg)          | 0.53           | 0.47            | 0.54            | 0.68                            | (0.60, 0.75) | 0.46            | 0.44            | 0.61            | 0.45                            | 0.67 | (0.55, 0.76) | 0.21 |
| With supplements             | 0.52           | 0.38            | 0.50            | 0.63                            | (0.54, 0.69) | 0.46            |                 |                 |                                 |      |              |      |
| Lutein-zeaxanthin (mcg)      | 0.55           | 0.53            | 0.57            | 0.70                            | (0.62, 0.76) | 0.51            | 0.46            | 0.45            | 0.49                            | 0.72 | (0.61, 0.81) | 0.22 |
| Lycopene (mcg)               | 0.37           | 0.42            | 0.35            | 0.71                            | (0.42, 0.87) | 0.14            | 0.12            | 0.23            | 0.08                            | 0.18 | (0.01, 0.35) | 0.09 |
| Beta cryptoxanthin (mcg)     | 0.36           | 0.22            | 0.39            | 0.57                            | (0.45, 0.67) | 0.30            | 0.33            | 0.37            | 0.36                            | 0.49 | (0.33, 0.62) | 0.14 |

**Web Table 5 (continued): Pearson Correlation Coefficient for Comparison of Daily Nutrient Intake From SFFQ2 with Averaged 7DDRs, and Averaged ASA24s, Unadjusted and Energy-adjusted (Data Provided by 632 U.S. Female Nurses Aged 45-80 Years, 2010-2012)**

| Nutrient                   | SFFQ2 vs. 7DDR |                 |                 |                                 |              |      | SFFQ2 vs. ASA24 |                 |                 |                                 |              |      |
|----------------------------|----------------|-----------------|-----------------|---------------------------------|--------------|------|-----------------|-----------------|-----------------|---------------------------------|--------------|------|
|                            | Un-adjusted    | Energy-adjusted |                 |                                 |              | ICC  | Un-adjusted     | Energy-adjusted |                 |                                 |              | ICC  |
|                            |                | Energy density  | Residual method | De-attenuated ( $\rho$ & 95%CI) |              |      |                 | Energy density  | Residual method | De-attenuated ( $\rho$ & 95%CI) |              |      |
| Vitamin B1 (mg)            | 0.37           | 0.31            | 0.49            | 0.59                            | (0.51, 0.66) | 0.52 | 0.33            | 0.32            | 0.40            | 0.62                            | (0.49, 0.73) | 0.18 |
| With supplements           | 0.75           | 0.36            | 0.74            | 0.80                            | (0.75, 0.83) | 0.77 |                 |                 |                 |                                 |              |      |
| Vitamin B2 (mg)            | 0.53           | 0.48            | 0.60            | 0.67                            | (0.61, 0.72) | 0.69 | 0.47            | 0.48            | 0.53            | 0.70                            | (0.61, 0.77) | 0.31 |
| With supplements           | 0.72           | 0.48            | 0.71            | 0.78                            | (0.73, 0.82) | 0.73 |                 |                 |                 |                                 |              |      |
| Vitamin B3 (mg)            | 0.38           | 0.45            | 0.49            | 0.58                            | (0.50, 0.64) | 0.57 | 0.31            | 0.35            | 0.39            | 0.60                            | (0.47, 0.71) | 0.18 |
| With supplements           | 0.75           | 0.75            | 0.76            | 0.83                            | (0.80, 0.86) | 0.73 |                 |                 |                 |                                 |              |      |
| Vitamin B6 (mg)            | 0.39           | 0.41            | 0.48            | 0.57                            | (0.50, 0.64) | 0.56 | 0.35            | 0.36            | 0.40            | 0.57                            | (0.45, 0.67) | 0.21 |
| With supplements           | 0.67           | 0.54            | 0.65            | 0.71                            | (0.66, 0.75) | 0.71 |                 |                 |                 |                                 |              |      |
| Vitamin B12 (mg)           | 0.44           | 0.37            | 0.46            | 0.57                            | (0.49, 0.65) | 0.48 | 0.30            | 0.23            | 0.30            | 0.63                            | (0.41, 0.78) | 0.09 |
| With supplements           | 0.68           | 0.53            | 0.66            | 0.72                            | (0.67, 0.77) | 0.73 |                 |                 |                 |                                 |              |      |
| Natural folate (mcg)       | 0.50           | 0.57            | 0.60            | 0.68                            | (0.62, 0.73) | 0.67 | 0.42            | 0.49            | 0.51            | 0.66                            | (0.57, 0.73) | 0.34 |
| Folic acid (mcg)           | 0.69           | 0.51            | 0.72            | 0.84                            | (0.79, 0.89) | 0.57 | 0.41            | 0.39            | 0.39            | 0.63                            | (0.49, 0.74) | 0.16 |
| With supplements           | 0.70           | 0.54            | 0.69            | 0.89                            | (0.80, 0.95) | 0.42 |                 |                 |                 |                                 |              |      |
| Dietary folate eqvts (mcg) | 0.47           | 0.50            | 0.56            | 0.64                            | (0.57, 0.70) | 0.60 | 0.37            | 0.37            | 0.41            | 0.56                            | (0.44, 0.66) | 0.22 |
| With supplements           | 0.73           | 0.55            | 0.73            | 0.79                            | (0.74, 0.83) | 0.75 |                 |                 |                 |                                 |              |      |
| Vitamin C (mg)             | 0.51           | 0.49            | 0.54            | 0.63                            | (0.56, 0.69) | 0.58 | 0.47            | 0.43            | 0.47            | 0.66                            | (0.56, 0.74) | 0.26 |
| With supplements           | 0.77           | 0.71            | 0.76            | 0.82                            | (0.79, 0.86) | 0.77 |                 |                 |                 |                                 |              |      |
| Vitamin D (mg)             | 0.61           | 0.47            | 0.60            | 0.70                            | (0.63, 0.75) | 0.60 | 0.48            | 0.41            | 0.49            | 0.78                            | (0.65, 0.87) | 0.18 |
| With supplements           | 0.70           | 0.40            | 0.67            | 0.74                            | (0.68, 0.78) | 0.72 |                 |                 |                 |                                 |              |      |
| Vitamin E (mg)             | 0.42           | 0.47            | 0.50            | 0.59                            | (0.51, 0.65) | 0.56 | 0.31            | 0.31            | 0.35            | 0.50                            | (0.39, 0.60) | 0.24 |
| With supplements           | 0.76           | 0.63            | 0.75            | 0.81                            | (0.77, 0.84) | 0.79 |                 |                 |                 |                                 |              |      |
| Vitamin K (mg)             | 0.55           | 0.55            | 0.59            | 0.72                            | (0.65, 0.78) | 0.50 | 0.39            | 0.38            | 0.43            | 0.66                            | (0.53, 0.76) | 0.19 |
| With supplements           | 0.51           | 0.10            | 0.52            | 0.60                            | (0.53, 0.66) | 0.60 |                 |                 |                 |                                 |              |      |
| Calcium (mg)               | 0.57           | 0.61            | 0.64            | 0.69                            | (0.64, 0.74) | 0.72 | 0.49            | 0.50            | 0.55            | 0.69                            | (0.58, 0.78) | 0.26 |
| With supplements           | 0.68           | 0.39            | 0.68            | 0.75                            | (0.70, 0.80) | 0.71 |                 |                 |                 |                                 |              |      |

**Web Table 5 (continued): Pearson correlation coefficient for comparison of daily nutrient intake from SFFQ2 with the means of two 7DDRs, and four ASA24s, unadjusted and energy-adjusted using energy density and residual method (data provided by 632 U.S. female nurses aged 45-80 years, 2010-2012)**

| Nutrient         | SFFQ2 vs. 7DDR |                 |                 |                            |              |      | SFFQ2 vs. ASA24 |                 |                 |                            |              |      |
|------------------|----------------|-----------------|-----------------|----------------------------|--------------|------|-----------------|-----------------|-----------------|----------------------------|--------------|------|
|                  | Un-adjusted    | Energy-adjusted |                 |                            |              | ICC  | Un-adjusted     | Energy-adjusted |                 |                            |              | ICC  |
|                  |                | Energy density  | Residual method | De-attenuated ( ρ & 95%CI) |              |      |                 | Energy density  | Residual method | De-attenuated ( ρ & 95%CI) |              |      |
| Magnesium (mg)   | 0.45           | 0.65            | 0.67            | 0.73                       | (0.68, 0.78) | 0.75 | 0.38            | 0.60            | 0.60            | 0.74                       | (0.67, 0.80) | 0.38 |
| With supplements | 0.60           | 0.70            | 0.73            | 0.74                       | (0.69, 0.79) | 0.81 |                 |                 |                 |                            |              |      |
| Iron (mg)        | 0.37           | 0.49            | 0.50            | 0.59                       | (0.51, 0.65) | 0.59 | 0.32            | 0.41            | 0.40            | 0.57                       | (0.44, 0.67) | 0.19 |
| With supplements | 0.44           | 0.47            | 0.50            | 0.61                       | (0.53, 0.67) | 0.51 |                 |                 |                 |                            |              |      |
| Copper (mg)      | 0.37           | 0.38            | 0.50            | 0.61                       | (0.53, 0.68) | 0.51 | 0.29            | 0.35            | 0.39            | 0.54                       | (0.43, 0.64) | 0.23 |
| With supplements | 0.53           | 0.44            | 0.54            | 0.62                       | (0.55, 0.67) | 0.63 |                 |                 |                 |                            |              |      |
| Zinc (mg)        | 0.38           | 0.41            | 0.44            | 0.54                       | (0.46, 0.61) | 0.53 | 0.32            | 0.23            | 0.30            | 0.56                       | (0.37, 0.71) | 0.10 |
| With supplements | 0.65           | 0.49            | 0.64            | 0.72                       | (0.66, 0.77) | 0.68 |                 |                 |                 |                            |              |      |
| Phosphorus (mg)  | 0.42           | 0.59            | 0.61            | 0.68                       | (0.62, 0.73) | 0.70 | 0.37            | 0.52            | 0.52            | 0.69                       | (0.57, 0.77) | 0.25 |
| With supplements | 0.43           | 0.58            | 0.60            | 0.66                       | (0.60, 0.71) | 0.69 |                 |                 |                 |                            |              |      |
| Choline (mg)     | 0.45           | 0.53            | 0.56            | 0.63                       | (0.57, 0.69) | 0.65 | 0.36            | 0.39            | 0.41            | 0.63                       | (0.51, 0.73) | 0.19 |
| With supplements | 0.44           | 0.46            | 0.51            | 0.59                       | (0.52, 0.65) | 0.61 |                 |                 |                 |                            |              |      |
| Potassium (mg)   | 0.47           | 0.58            | 0.61            | 0.67                       | (0.61, 0.72) | 0.75 | 0.43            | 0.52            | 0.55            | 0.67                       | (0.59, 0.74) | 0.36 |
| With supplements | 0.47           | 0.58            | 0.59            | 0.65                       | (0.59, 0.70) | 0.73 |                 |                 |                 |                            |              |      |
| Sodium (mg)      | 0.30           | 0.47            | 0.46            | 0.55                       | (0.47, 0.62) | 0.53 | 0.27            | 0.31            | 0.28            | 0.41                       | (0.29, 0.52) | 0.21 |
| Caffeine (mg)    | 0.73           | 0.70            | 0.73            | 0.78                       | (0.74, 0.82) | 0.80 | 0.70            | 0.65            | 0.70            | 0.81                       | (0.75, 0.86) | 0.42 |

Abbreviations: CI, confidence interval; ICC, intra class correlation; FA, fatty acid; Eqvts, equivalents; SFFQ, The semi-quantitative food frequency questionnaire; 7DDR, 7 Day Dietary Records; ASA24, Web-based, automated-self-administered 24-hour dietary recall.

**Web Table 6: Spearman correlation coefficient for comparison of daily nutrient intake from SFFQ1 with the means of two 7DDRs, and four ASA24s, unadjusted and energy-adjusted using energy density and residual method (data provided by 632 U.S. female nurses aged 45-80 years, 2010-2012)**

| Nutrient                     | SFFQ1 vs. 7DDR |                 |                 |                           |              |      | SFFQ1 vs. ASA24 |                 |                 |                           |              |      |
|------------------------------|----------------|-----------------|-----------------|---------------------------|--------------|------|-----------------|-----------------|-----------------|---------------------------|--------------|------|
|                              | Un-adjusted    | Energy-adjusted |                 |                           |              | ICC  | Un-adjusted     | Energy-adjusted |                 |                           |              | ICC  |
|                              |                | Energy density  | Residual method | De-attenuated (ρ & 95%CI) |              |      |                 | Energy density  | Residual method | De-attenuated (ρ & 95%CI) |              |      |
| Total energy (kcal)          | 0.28           |                 |                 | 0.31                      | (0.23, 0.38) | 0.64 | 0.31            |                 |                 | 0.42                      | (0.33, 0.51) | 0.29 |
| Total fat (g)                | 0.37           | 0.57            | 0.58            | 0.65                      | (0.59, 0.70) | 0.65 | 0.34            | 0.52            | 0.53            | 0.76                      | (0.64, 0.84) | 0.23 |
| Saturated fat (g)            | 0.43           | 0.60            | 0.60            | 0.67                      | (0.61, 0.72) | 0.65 | 0.42            | 0.52            | 0.51            | 0.71                      | (0.61, 0.79) | 0.25 |
| Polyunsaturated fat (g)      | 0.35           | 0.47            | 0.48            | 0.59                      | (0.50, 0.65) | 0.49 | 0.29            | 0.39            | 0.39            | 0.68                      | (0.51, 0.81) | 0.12 |
| Monounsaturated fat (g)      | 0.38           | 0.49            | 0.49            | 0.57                      | (0.50, 0.63) | 0.58 | 0.31            | 0.40            | 0.42            | 0.62                      | (0.51, 0.71) | 0.21 |
| Arachadonic FA (g)           | 0.38           | 0.46            | 0.45            | 0.54                      | (0.46, 0.61) | 0.51 | 0.27            | 0.28            | 0.29            | 0.41                      | (0.28, 0.53) | 0.16 |
| Lauric FA (g)                | 0.35           | 0.37            | 0.37            | 0.48                      | (0.38, 0.56) | 0.43 | 0.39            | 0.38            | 0.37            | 0.56                      | (0.44, 0.65) | 0.21 |
| Linoleic FA (g)              | 0.35           | 0.47            | 0.48            | 0.58                      | (0.50, 0.65) | 0.49 | 0.30            | 0.39            | 0.39            | 0.66                      | (0.48, 0.79) | 0.13 |
| Linolenic FA (g)             | 0.39           | 0.44            | 0.44            | 0.56                      | (0.47, 0.63) | 0.44 | 0.27            | 0.30            | 0.31            | 0.55                      | (0.40, 0.67) | 0.13 |
| N-3 (DHA+EPA)                | 0.49           | 0.50            | 0.48            | 0.62                      | (0.53, 0.70) | 0.41 | 0.28            | 0.28            | 0.28            | 0.52                      | (0.29, 0.69) | 0.08 |
| With supplements             | 0.59           | 0.59            | 0.58            | 0.65                      | (0.58, 0.70) | 0.63 |                 |                 |                 |                           |              |      |
| Oleic FA (g)                 | 0.38           | 0.49            | 0.49            | 0.57                      | (0.49, 0.63) | 0.58 | 0.31            | 0.40            | 0.42            | 0.63                      | (0.51, 0.72) | 0.20 |
| Cholesterol (mg)             | 0.53           | 0.57            | 0.58            | 0.68                      | (0.61, 0.73) | 0.58 | 0.37            | 0.34            | 0.34            | 0.55                      | (0.41, 0.66) | 0.16 |
| Protein (g)                  | 0.36           | 0.48            | 0.48            | 0.55                      | (0.47, 0.61) | 0.61 | 0.35            | 0.38            | 0.38            | 0.47                      | (0.36, 0.58) | 0.21 |
| Carbohydrates (g)            | 0.40           | 0.66            | 0.65            | 0.69                      | (0.64, 0.73) | 0.74 | 0.41            | 0.52            | 0.52            | 0.66                      | (0.58, 0.73) | 0.34 |
| Total sugar (g)              | 0.53           | 0.69            | 0.69            | 0.75                      | (0.70, 0.79) | 0.75 | 0.51            | 0.59            | 0.59            | 0.71                      | (0.63, 0.77) | 0.37 |
| Fiber (g)                    | 0.50           | 0.65            | 0.63            | 0.66                      | (0.61, 0.71) | 0.75 | 0.45            | 0.53            | 0.53            | 0.64                      | (0.55, 0.71) | 0.33 |
| Alcohol (g)                  | 0.84           | 0.86            | 0.77            | 0.84                      | (0.80, 0.87) | 0.73 | 0.75            | 0.74            | 0.66            | 0.77                      | (0.70, 0.82) | 0.46 |
| Retinol activity eqvts (mcg) | 0.43           | 0.47            | 0.48            | 0.65                      | (0.55, 0.72) | 0.37 | 0.37            | 0.39            | 0.39            | 0.56                      | (0.44, 0.66) | 0.20 |
| With supplements             | 0.60           | 0.62            | 0.62            | 0.70                      | (0.64, 0.75) | 0.65 |                 |                 |                 |                           |              |      |
| Alpha carotene (mcg)         | 0.43           | 0.41            | 0.40            | 0.54                      | (0.44, 0.62) | 0.37 | 0.32            | 0.31            | 0.32            | 0.52                      | (0.38, 0.64) | 0.14 |
| Beta carotene (mcg)          | 0.49           | 0.50            | 0.49            | 0.63                      | (0.54, 0.70) | 0.44 | 0.40            | 0.41            | 0.42            | 0.63                      | (0.51, 0.72) | 0.20 |
| With supplements             | 0.48           | 0.48            | 0.48            | 0.60                      | (0.51, 0.67) | 0.46 |                 |                 |                 |                           |              |      |
| Lutein-zeaxanthin (mcg)      | 0.49           | 0.50            | 0.50            | 0.61                      | (0.53, 0.68) | 0.50 | 0.39            | 0.41            | 0.41            | 0.60                      | (0.49, 0.69) | 0.21 |
| Lycopene (mcg)               | 0.40           | 0.37            | 0.37            | 0.59                      | (0.44, 0.71) | 0.23 | 0.18            | 0.15            | 0.11            | 0.18                      | (0.04, 0.33) | 0.11 |
| Beta cryptoxanthin (mcg)     | 0.38           | 0.39            | 0.38            | 0.56                      | (0.44, 0.65) | 0.31 | 0.40            | 0.40            | 0.41            | 0.59                      | (0.44, 0.70) | 0.15 |



**Web Table 6 (continued): Spearman correlation coefficient for comparison of daily nutrient intake from SFFQ1 with the means of two 7DDRs, and four ASA24s, unadjusted and energy-adjusted using energy density and residual method (data provided by 632 U.S. female nurses aged 45-80 years, 2010-2012)**

| Nutrient                   | SFFQ1 vs. 7DDR |                 |                 |                                 |              |      | SFFQ1 vs. ASA24 |                 |                 |                                 |              |      |
|----------------------------|----------------|-----------------|-----------------|---------------------------------|--------------|------|-----------------|-----------------|-----------------|---------------------------------|--------------|------|
|                            | Un-adjusted    | Energy-adjusted |                 |                                 |              | ICC  | Un-adjusted     | Energy-adjusted |                 |                                 |              | ICC  |
|                            |                | Energy density  | Residual method | De-attenuated ( $\rho$ & 95%CI) |              |      |                 | Energy density  | Residual method | De-attenuated ( $\rho$ & 95%CI) |              |      |
| Vitamin B1 (mg)            | 0.35           | 0.47            | 0.47            | 0.56                            | (0.48, 0.63) | 0.52 | 0.29            | 0.34            | 0.34            | 0.50                            | (0.37, 0.60) | 0.19 |
| With supplements           | 0.66           | 0.69            | 0.67            | 0.73                            | (0.67, 0.78) | 0.71 |                 |                 |                 |                                 |              |      |
| Vitamin B2 (mg)            | 0.52           | 0.57            | 0.60            | 0.67                            | (0.61, 0.72) | 0.69 | 0.47            | 0.49            | 0.52            | 0.60                            | (0.50, 0.68) | 0.31 |
| With supplements           | 0.68           | 0.68            | 0.70            | 0.74                            | (0.68, 0.78) | 0.75 |                 |                 |                 |                                 |              |      |
| Vitamin B3 (mg)            | 0.34           | 0.46            | 0.45            | 0.54                            | (0.46, 0.60) | 0.54 | 0.32            | 0.38            | 0.38            | 0.47                            | (0.34, 0.59) | 0.17 |
| With supplements           | 0.67           | 0.70            | 0.69            | 0.76                            | (0.71, 0.80) | 0.72 |                 |                 |                 |                                 |              |      |
| Vitamin B6 (mg)            | 0.36           | 0.45            | 0.44            | 0.51                            | (0.43, 0.58) | 0.58 | 0.31            | 0.32            | 0.33            | 0.49                            | (0.37, 0.60) | 0.19 |
| With supplements           | 0.65           | 0.65            | 0.65            | 0.72                            | (0.66, 0.77) | 0.72 |                 |                 |                 |                                 |              |      |
| Vitamin B12 (mg)           | 0.41           | 0.41            | 0.42            | 0.52                            | (0.43, 0.59) | 0.48 | 0.34            | 0.32            | 0.33            | 0.45                            | (0.29, 0.59) | 0.11 |
| With supplements           | 0.68           | 0.67            | 0.66            | 0.73                            | (0.67, 0.78) | 0.72 |                 |                 |                 |                                 |              |      |
| Natural folate (mcg)       | 0.49           | 0.53            | 0.54            | 0.61                            | (0.54, 0.67) | 0.65 | 0.39            | 0.46            | 0.45            | 0.59                            | (0.50, 0.66) | 0.33 |
| Folic acid (mcg)           | 0.49           | 0.54            | 0.53            | 0.61                            | (0.54, 0.67) | 0.59 | 0.35            | 0.37            | 0.36            | 0.50                            | (0.38, 0.59) | 0.23 |
| With supplements           | 0.61           | 0.62            | 0.62            | 0.68                            | (0.63, 0.73) | 0.72 |                 |                 |                 |                                 |              |      |
| Dietary folate eqvts (mcg) | 0.40           | 0.49            | 0.48            | 0.57                            | (0.49, 0.63) | 0.56 | 0.30            | 0.36            | 0.35            | 0.52                            | (0.40, 0.61) | 0.20 |
| With supplements           | 0.62           | 0.63            | 0.63            | 0.69                            | (0.64, 0.73) | 0.73 |                 |                 |                 |                                 |              |      |
| Vitamin C (mg)             | 0.48           | 0.49            | 0.49            | 0.57                            | (0.5, 0.64)  | 0.57 | 0.43            | 0.43            | 0.43            | 0.59                            | (0.49, 0.67) | 0.28 |
| With supplements           | 0.67           | 0.67            | 0.66            | 0.72                            | (0.67, 0.77) | 0.73 |                 |                 |                 |                                 |              |      |
| Vitamin D (mg)             | 0.57           | 0.54            | 0.55            | 0.64                            | (0.57, 0.69) | 0.58 | 0.53            | 0.50            | 0.50            | 0.63                            | (0.50, 0.73) | 0.20 |
| With supplements           | 0.58           | 0.52            | 0.56            | 0.62                            | (0.56, 0.67) | 0.72 |                 |                 |                 |                                 |              |      |
| Vitamin E (mg)             | 0.43           | 0.47            | 0.47            | 0.57                            | (0.49, 0.63) | 0.53 | 0.29            | 0.32            | 0.32            | 0.45                            | (0.35, 0.55) | 0.23 |
| With supplements           | 0.72           | 0.72            | 0.72            | 0.75                            | (0.71, 0.80) | 0.77 |                 |                 |                 |                                 |              |      |
| Vitamin K (mg)             | 0.51           | 0.53            | 0.53            | 0.65                            | (0.57, 0.72) | 0.48 | 0.35            | 0.38            | 0.38            | 0.61                            | (0.48, 0.70) | 0.17 |
| With supplements           | 0.50           | 0.51            | 0.51            | 0.61                            | (0.54, 0.68) | 0.53 |                 |                 |                 |                                 |              |      |
| Calcium (mg)               | 0.54           | 0.59            | 0.61            | 0.67                            | (0.61, 0.72) | 0.70 | 0.50            | 0.56            | 0.57            | 0.64                            | (0.53, 0.73) | 0.26 |
| With supplements           | 0.64           | 0.62            | 0.66            | 0.72                            | (0.67, 0.77) | 0.73 |                 |                 |                 |                                 |              |      |

**Web Table 6 (continued): Spearman correlation coefficient for comparison of daily nutrient intake from SFFQ1 with the means of two 7DDRs, and four ASA24s, unadjusted and energy-adjusted using energy density and residual method (data provided by 632 U.S. female nurses aged 45-80 years, 2010-2012)**

| Nutrient         | SFFQ1 vs. 7DDR |                 |                 |                                 |              |      | SFFQ1 vs. ASA24 |                 |                 |                                 |              |      |
|------------------|----------------|-----------------|-----------------|---------------------------------|--------------|------|-----------------|-----------------|-----------------|---------------------------------|--------------|------|
|                  | Un-adjusted    | Energy-adjusted |                 |                                 |              | ICC  | Un-adjusted     | Energy-adjusted |                 |                                 |              | ICC  |
|                  |                | Energy density  | Residual method | De-attenuated ( $\rho$ & 95%CI) |              |      |                 | Energy density  | Residual method | De-attenuated ( $\rho$ & 95%CI) |              |      |
| Magnesium (mg)   | 0.45           | 0.60            | 0.60            | 0.66                            | (0.60, 0.71) | 0.73 | 0.43            | 0.55            | 0.55            | 0.70                            | (0.62, 0.77) | 0.37 |
| With supplements | 0.57           | 0.67            | 0.68            | 0.73                            | (0.68, 0.78) | 0.80 |                 |                 |                 |                                 |              |      |
| Iron (mg)        | 0.37           | 0.47            | 0.47            | 0.55                            | (0.48, 0.62) | 0.54 | 0.28            | 0.35            | 0.34            | 0.53                            | (0.41, 0.63) | 0.19 |
| With supplements | 0.44           | 0.50            | 0.49            | 0.59                            | (0.51, 0.66) | 0.50 |                 |                 |                 |                                 |              |      |
| Copper (mg)      | 0.37           | 0.46            | 0.45            | 0.51                            | (0.43, 0.58) | 0.60 | 0.34            | 0.35            | 0.35            | 0.49                            | (0.38, 0.58) | 0.25 |
| With supplements | 0.51           | 0.54            | 0.54            | 0.61                            | (0.54, 0.66) | 0.64 |                 |                 |                 |                                 |              |      |
| Zinc (mg)        | 0.38           | 0.40            | 0.41            | 0.51                            | (0.42, 0.58) | 0.49 | 0.32            | 0.29            | 0.30            | 0.52                            | (0.35, 0.66) | 0.11 |
| With supplements | 0.58           | 0.57            | 0.57            | 0.64                            | (0.58, 0.70) | 0.66 |                 |                 |                 |                                 |              |      |
| Phosphorus (mg)  | 0.42           | 0.52            | 0.54            | 0.60                            | (0.54, 0.66) | 0.68 | 0.42            | 0.49            | 0.50            | 0.61                            | (0.49, 0.70) | 0.24 |
| With supplements | 0.43           | 0.53            | 0.56            | 0.62                            | (0.56, 0.67) | 0.68 |                 |                 |                 |                                 |              |      |
| Choline (mg)     | 0.47           | 0.51            | 0.53            | 0.61                            | (0.54, 0.66) | 0.63 | 0.39            | 0.35            | 0.36            | 0.53                            | (0.40, 0.63) | 0.19 |
| With supplements | 0.47           | 0.52            | 0.54            | 0.62                            | (0.55, 0.67) | 0.62 |                 |                 |                 |                                 |              |      |
| Potassium (mg)   | 0.47           | 0.51            | 0.54            | 0.57                            | (0.51, 0.63) | 0.73 | 0.44            | 0.47            | 0.49            | 0.61                            | (0.52, 0.67) | 0.36 |
| With supplements | 0.47           | 0.52            | 0.55            | 0.58                            | (0.52, 0.64) | 0.73 |                 |                 |                 |                                 |              |      |
| Sodium (mg)      | 0.31           | 0.42            | 0.41            | 0.49                            | (0.41, 0.57) | 0.50 | 0.26            | 0.26            | 0.25            | 0.37                            | (0.25, 0.47) | 0.20 |
| Caffeine (mg)    | 0.78           | 0.76            | 0.77            | 0.81                            | (0.78, 0.84) | 0.86 | 0.74            | 0.75            | 0.74            | 0.79                            | (0.73, 0.84) | 0.50 |

Abbreviations: CI, confidence interval; ICC, intra class correlation; FA, fatty acid; Eqvts, equivalents; SFFQ, The semi-quantitative food frequency questionnaire; 7DDR, 7 Day Dietary Records; ASA24, Web-based, automated-self-administered 24-hour dietary recall.

**Web Table 7: Spearman correlation coefficient for comparison of daily nutrient intake from WebFFQ with the means of two 7DDRs, and four ASA24s, unadjusted and energy-adjusted using energy density and residual method (data provided by 632 U.S. female nurses aged 45-80 years, 2010-2012)**

| Nutrient                     | WebFFQ vs. 7DDR |                 |                 |                           |              | WebFFQ vs. ASA24 |                 |                 |                           |      |              |      |
|------------------------------|-----------------|-----------------|-----------------|---------------------------|--------------|------------------|-----------------|-----------------|---------------------------|------|--------------|------|
|                              | Un-adjusted     | Energy-adjusted |                 |                           |              | Un-adjusted      | Energy-adjusted |                 |                           |      |              |      |
|                              |                 | Energy density  | Residual method | De-attenuated (ρ & 95%CI) | ICC          |                  | Energy density  | Residual method | De-attenuated (ρ & 95%CI) | ICC  |              |      |
| Total energy (kcal)          | 0.27            |                 |                 | 0.30                      | (0.22, 0.37) | 0.64             | 0.30            |                 |                           | 0.39 | (0.29, 0.48) | 0.29 |
| Total fat (g)                | 0.32            | 0.55            | 0.56            | 0.63                      | (0.56, 0.68) | 0.65             | 0.31            | 0.50            | 0.51                      | 0.73 | (0.62, 0.82) | 0.23 |
| Saturated fat (g)            | 0.39            | 0.59            | 0.60            | 0.67                      | (0.61, 0.72) | 0.65             | 0.39            | 0.52            | 0.51                      | 0.68 | (0.57, 0.77) | 0.25 |
| Polyunsaturated fat (g)      | 0.27            | 0.47            | 0.48            | 0.59                      | (0.51, 0.66) | 0.49             | 0.26            | 0.38            | 0.39                      | 0.61 | (0.43, 0.74) | 0.12 |
| Monounsaturated fat (g)      | 0.35            | 0.48            | 0.49            | 0.57                      | (0.49, 0.63) | 0.58             | 0.28            | 0.39            | 0.40                      | 0.60 | (0.48, 0.69) | 0.21 |
| Arachadonic FA (g)           | 0.39            | 0.46            | 0.45            | 0.55                      | (0.46, 0.61) | 0.51             | 0.27            | 0.29            | 0.29                      | 0.47 | (0.35, 0.58) | 0.16 |
| Lauric FA (g)                | 0.33            | 0.36            | 0.36            | 0.46                      | (0.37, 0.54) | 0.43             | 0.36            | 0.36            | 0.36                      | 0.54 | (0.43, 0.63) | 0.21 |
| Linoleic FA (g)              | 0.28            | 0.45            | 0.47            | 0.58                      | (0.49, 0.64) | 0.49             | 0.25            | 0.37            | 0.38                      | 0.61 | (0.44, 0.74) | 0.13 |
| Linolenic FA (g)             | 0.34            | 0.45            | 0.45            | 0.58                      | (0.49, 0.65) | 0.44             | 0.27            | 0.33            | 0.34                      | 0.54 | (0.37, 0.66) | 0.13 |
| N-3 (DHA+EPA) FA (g)         | 0.50            | 0.52            | 0.51            | 0.66                      | (0.57, 0.73) | 0.41             | 0.30            | 0.31            | 0.30                      | 0.63 | (0.38, 0.80) | 0.08 |
| With supplements             | 0.60            | 0.62            | 0.60            | 0.68                      | (0.62, 0.73) | 0.63             |                 |                 |                           |      |              |      |
| Oleic FA (g)                 | 0.35            | 0.48            | 0.48            | 0.56                      | (0.49, 0.62) | 0.58             | 0.28            | 0.38            | 0.39                      | 0.59 | (0.47, 0.69) | 0.20 |
| Cholesterol (mg)             | 0.49            | 0.55            | 0.55            | 0.65                      | (0.58, 0.70) | 0.58             | 0.38            | 0.38            | 0.38                      | 0.62 | (0.48, 0.72) | 0.16 |
| Protein (g)                  | 0.34            | 0.47            | 0.48            | 0.54                      | (0.46, 0.60) | 0.61             | 0.32            | 0.39            | 0.39                      | 0.53 | (0.41, 0.63) | 0.21 |
| Carbohydrates (g)            | 0.40            | 0.64            | 0.64            | 0.67                      | (0.62, 0.72) | 0.74             | 0.40            | 0.56            | 0.56                      | 0.71 | (0.62, 0.78) | 0.34 |
| Total sugar (g)              | 0.51            | 0.67            | 0.67            | 0.73                      | (0.68, 0.78) | 0.75             | 0.49            | 0.61            | 0.61                      | 0.72 | (0.64, 0.79) | 0.37 |
| Fiber (g)                    | 0.46            | 0.64            | 0.62            | 0.65                      | (0.59, 0.70) | 0.75             | 0.41            | 0.53            | 0.53                      | 0.67 | (0.59, 0.74) | 0.33 |
| Alcohol (g)                  | 0.85            | 0.86            | 0.75            | 0.82                      | (0.78, 0.85) | 0.73             | 0.75            | 0.74            | 0.65                      | 0.75 | (0.69, 0.81) | 0.46 |
| Retinol activity eqvts (mcg) | 0.39            | 0.46            | 0.46            | 0.61                      | (0.51, 0.69) | 0.37             | 0.32            | 0.37            | 0.37                      | 0.56 | (0.44, 0.66) | 0.20 |
| With supplements             | 0.63            | 0.67            | 0.66            | 0.74                      | (0.68, 0.79) | 0.65             |                 |                 |                           |      |              |      |
| Alpha carotene (mcg)         | 0.45            | 0.45            | 0.43            | 0.58                      | (0.48, 0.66) | 0.37             | 0.34            | 0.34            | 0.35                      | 0.59 | (0.45, 0.70) | 0.14 |
| Beta carotene (mcg)          | 0.47            | 0.51            | 0.50            | 0.63                      | (0.55, 0.70) | 0.44             | 0.42            | 0.43            | 0.44                      | 0.63 | (0.51, 0.72) | 0.20 |
| With supplements             | 0.47            | 0.50            | 0.49            | 0.61                      | (0.52, 0.68) | 0.46             |                 |                 |                           |      |              |      |
| Lutein-zeaxanthin (mcg)      | 0.50            | 0.52            | 0.51            | 0.63                      | (0.55, 0.69) | 0.50             | 0.46            | 0.49            | 0.49                      | 0.61 | (0.48, 0.71) | 0.21 |
| Lycopene (mcg)               | 0.42            | 0.41            | 0.40            | 0.65                      | (0.49, 0.77) | 0.23             | 0.20            | 0.17            | 0.14                      | 0.26 | (0.11, 0.39) | 0.11 |
| Beta cryptoxanthin (mcg)     | 0.36            | 0.36            | 0.36            | 0.52                      | (0.40, 0.61) | 0.31             | 0.39            | 0.40            | 0.40                      | 0.66 | (0.51, 0.77) | 0.15 |

**Web Table 7 (continued): Spearman correlation coefficient for comparison of daily nutrient intake from WebFFQ with the means of two 7DDR<sub>s</sub>, and four ASA24<sub>s</sub>, unadjusted and energy-adjusted using energy density and residual method (data provided by 632 U.S. female nurses aged 45-80 years, 2010-2012)**

| Nutrient                   | WebFFQ vs. 7DDR |                 |                 |                           |              |      | WebFFQ vs. ASA24 |                 |                 |                           |              |      |
|----------------------------|-----------------|-----------------|-----------------|---------------------------|--------------|------|------------------|-----------------|-----------------|---------------------------|--------------|------|
|                            | Un-adjusted     | Energy-adjusted |                 |                           |              | ICC  | Un-adjusted      | Energy-adjusted |                 |                           |              | ICC  |
|                            |                 | Energy density  | Residual method | De-attenuated (ρ & 95%CI) |              |      |                  | Energy density  | Residual method | De-attenuated (ρ & 95%CI) |              |      |
| Vitamin B1 (mg)            | 0.34            | 0.51            | 0.50            | 0.61                      | (0.53, 0.67) | 0.52 | 0.30             | 0.37            | 0.36            | 0.55                      | (0.41, 0.65) | 0.19 |
| With supplements           | 0.66            | 0.68            | 0.67            | 0.74                      | (0.69, 0.79) | 0.71 |                  |                 |                 |                           |              |      |
| Vitamin B2 (mg)            | 0.49            | 0.57            | 0.60            | 0.66                      | (0.60, 0.71) | 0.69 | 0.47             | 0.55            | 0.57            | 0.70                      | (0.60, 0.77) | 0.31 |
| With supplements           | 0.65            | 0.68            | 0.68            | 0.74                      | (0.69, 0.79) | 0.75 |                  |                 |                 |                           |              |      |
| Vitamin B3 (mg)            | 0.32            | 0.46            | 0.46            | 0.54                      | (0.46, 0.61) | 0.54 | 0.25             | 0.32            | 0.31            | 0.49                      | (0.36, 0.60) | 0.17 |
| With supplements           | 0.65            | 0.69            | 0.69            | 0.76                      | (0.71, 0.80) | 0.72 |                  |                 |                 |                           |              |      |
| Vitamin B6 (mg)            | 0.35            | 0.48            | 0.48            | 0.56                      | (0.48, 0.62) | 0.58 | 0.33             | 0.40            | 0.40            | 0.60                      | (0.47, 0.70) | 0.19 |
| With supplements           | 0.64            | 0.65            | 0.65            | 0.71                      | (0.65, 0.75) | 0.72 |                  |                 |                 |                           |              |      |
| Vitamin B12 (mg)           | 0.42            | 0.46            | 0.46            | 0.57                      | (0.49, 0.64) | 0.48 | 0.31             | 0.30            | 0.30            | 0.53                      | (0.37, 0.66) | 0.11 |
| With supplements           | 0.66            | 0.65            | 0.65            | 0.72                      | (0.66, 0.77) | 0.72 |                  |                 |                 |                           |              |      |
| Natural folate (mcg)       | 0.44            | 0.56            | 0.56            | 0.64                      | (0.57, 0.69) | 0.65 | 0.40             | 0.50            | 0.49            | 0.60                      | (0.50, 0.67) | 0.33 |
| Folic acid (mcg)           | 0.51            | 0.57            | 0.57            | 0.66                      | (0.59, 0.71) | 0.59 | 0.42             | 0.45            | 0.44            | 0.57                      | (0.45, 0.66) | 0.23 |
| With supplements           | 0.65            | 0.68            | 0.67            | 0.73                      | (0.68, 0.78) | 0.72 |                  |                 |                 |                           |              |      |
| Dietary folate eqvts (mcg) | 0.38            | 0.50            | 0.50            | 0.58                      | (0.50, 0.64) | 0.56 | 0.33             | 0.42            | 0.42            | 0.58                      | (0.45, 0.67) | 0.20 |
| With supplements           | 0.65            | 0.68            | 0.68            | 0.74                      | (0.69, 0.79) | 0.73 |                  |                 |                 |                           |              |      |
| Vitamin C (mg)             | 0.47            | 0.51            | 0.50            | 0.59                      | (0.52, 0.65) | 0.57 | 0.49             | 0.49            | 0.49            | 0.65                      | (0.55, 0.72) | 0.28 |
| With supplements           | 0.68            | 0.69            | 0.69            | 0.76                      | (0.71, 0.80) | 0.73 |                  |                 |                 |                           |              |      |
| Vitamin D (mg)             | 0.56            | 0.57            | 0.58            | 0.67                      | (0.60, 0.72) | 0.58 | 0.52             | 0.49            | 0.49            | 0.74                      | (0.62, 0.83) | 0.20 |
| With supplements           | 0.62            | 0.57            | 0.59            | 0.65                      | (0.59, 0.70) | 0.72 |                  |                 |                 |                           |              |      |
| Vitamin E (mg)             | 0.33            | 0.44            | 0.43            | 0.52                      | (0.43, 0.59) | 0.53 | 0.26             | 0.34            | 0.33            | 0.47                      | (0.37, 0.57) | 0.23 |
| With supplements           | 0.70            | 0.72            | 0.71            | 0.77                      | (0.72, 0.81) | 0.77 |                  |                 |                 |                           |              |      |
| Vitamin K (mg)             | 0.50            | 0.55            | 0.54            | 0.67                      | (0.59, 0.73) | 0.48 | 0.36             | 0.42            | 0.41            | 0.58                      | (0.44, 0.69) | 0.17 |
| With supplements           | 0.48            | 0.52            | 0.51            | 0.61                      | (0.54, 0.68) | 0.53 |                  |                 |                 |                           |              |      |
| Calcium (mg)               | 0.51            | 0.60            | 0.61            | 0.66                      | (0.60, 0.70) | 0.70 | 0.46             | 0.51            | 0.51            | 0.64                      | (0.53, 0.73) | 0.26 |
| With supplements           | 0.62            | 0.66            | 0.67            | 0.71                      | (0.66, 0.75) | 0.73 |                  |                 |                 |                           |              |      |

**Web Table 7 (continued): Spearman correlation coefficient for comparison of daily nutrient intake from WebFFQ with the means of two 7DDRs, and four ASA24s, unadjusted and energy-adjusted using energy density and residual method (data provided by 632 U.S. female nurses aged 45-80 years, 2010-2012)**

| Nutrient         | WebFFQ vs. 7DDR |                 |                 |                           |              |      | WebFFQ vs. ASA24 |                 |                 |                           |              |      |
|------------------|-----------------|-----------------|-----------------|---------------------------|--------------|------|------------------|-----------------|-----------------|---------------------------|--------------|------|
|                  | Un-adjusted     | Energy-adjusted |                 |                           |              | ICC  | Un-adjusted      | Energy-adjusted |                 |                           |              | ICC  |
|                  |                 | Energy density  | Residual method | De-attenuated (ρ & 95%CI) |              |      |                  | Energy density  | Residual method | De-attenuated (ρ & 95%CI) |              |      |
| Magnesium (mg)   | 0.38            | 0.61            | 0.61            | 0.66                      | (0.61, 0.71) | 0.73 | 0.34             | 0.52            | 0.51            | 0.65                      | (0.57, 0.71) | 0.37 |
| With supplements | 0.53            | 0.70            | 0.70            | 0.75                      | (0.70, 0.79) | 0.80 |                  |                 |                 |                           |              |      |
| Iron (mg)        | 0.37            | 0.55            | 0.54            | 0.64                      | (0.57, 0.70) | 0.54 | 0.30             | 0.44            | 0.42            | 0.61                      | (0.48, 0.71) | 0.19 |
| With supplements | 0.39            | 0.48            | 0.47            | 0.57                      | (0.49, 0.64) | 0.50 |                  |                 |                 |                           |              |      |
| Copper (mg)      | 0.34            | 0.48            | 0.46            | 0.54                      | (0.46, 0.60) | 0.60 | 0.27             | 0.37            | 0.35            | 0.50                      | (0.39, 0.59) | 0.25 |
| With supplements | 0.46            | 0.53            | 0.50            | 0.57                      | (0.50, 0.63) | 0.64 |                  |                 |                 |                           |              |      |
| Zinc (mg)        | 0.35            | 0.42            | 0.43            | 0.53                      | (0.44, 0.60) | 0.49 | 0.29             | 0.28            | 0.28            | 0.53                      | (0.36, 0.66) | 0.11 |
| With supplements | 0.55            | 0.57            | 0.58            | 0.65                      | (0.59, 0.70) | 0.66 |                  |                 |                 |                           |              |      |
| Phosphorus (mg)  | 0.38            | 0.55            | 0.56            | 0.62                      | (0.56, 0.67) | 0.68 | 0.37             | 0.50            | 0.51            | 0.59                      | (0.47, 0.68) | 0.24 |
| With supplements | 0.38            | 0.55            | 0.56            | 0.62                      | (0.56, 0.67) | 0.68 |                  |                 |                 |                           |              |      |
| Choline (mg)     | 0.44            | 0.52            | 0.54            | 0.61                      | (0.54, 0.67) | 0.63 | 0.37             | 0.38            | 0.38            | 0.58                      | (0.45, 0.68) | 0.19 |
| With supplements | 0.44            | 0.52            | 0.54            | 0.61                      | (0.55, 0.67) | 0.62 |                  |                 |                 |                           |              |      |
| Potassium (mg)   | 0.43            | 0.51            | 0.53            | 0.59                      | (0.52, 0.64) | 0.73 | 0.42             | 0.47            | 0.49            | 0.60                      | (0.52, 0.67) | 0.36 |
| With supplements | 0.42            | 0.51            | 0.53            | 0.58                      | (0.52, 0.64) | 0.73 |                  |                 |                 |                           |              |      |
| Sodium (mg)      | 0.27            | 0.44            | 0.42            | 0.51                      | (0.42, 0.58) | 0.50 | 0.27             | 0.33            | 0.32            | 0.47                      | (0.36, 0.57) | 0.20 |
| Caffeine (mg)    | 0.77            | 0.76            | 0.76            | 0.80                      | (0.77, 0.83) | 0.86 | 0.72             | 0.74            | 0.71            | 0.78                      | (0.72, 0.83) | 0.50 |

Abbreviations: CI, confidence interval; ICC, intra class correlation; FA, fatty acid; Eqvts, equivalents; WebFFQ, The semi-quantitative Web-based food frequency questionnaire; 7DDR, 7 Day Dietary Records; ASA24, Web-based, automated-self-administered 24-hour dietary recall.

**Web Table 8: Spearman correlation coefficient for comparison of daily nutrient intake from SFFQ2 with the means of two 7DDRs, and four ASA24s, unadjusted and energy-adjusted and de-attenuated results (data provided by 226 U.S. female nurses with complete four ASA24, 2010-2012)**

| Nutrient                     | SFFQ2 vs. 7DDR |                 |                                 |      | SFFQ2 vs. ASA24 |                 |                                 |      |
|------------------------------|----------------|-----------------|---------------------------------|------|-----------------|-----------------|---------------------------------|------|
|                              | Un-adjusted    | Energy-adjusted |                                 |      | Un-adjusted     | Energy-adjusted |                                 |      |
|                              |                | Residual method | De-attenuated ( $\rho$ & 95%CI) | ICC  |                 | Residual method | De-attenuated ( $\rho$ & 95%CI) | ICC  |
| Total energy (kcal)          | 0.29           |                 | 0.32 (0.19, 0.44)               | 0.67 | 0.39            |                 | 0.50 (0.35, 0.63)               | 0.27 |
| Total fat (g)                | 0.33           | 0.56            | 0.63 (0.52, 0.71)               | 0.65 | 0.39            | 0.56            | 0.75 (0.58, 0.86)               | 0.23 |
| Saturated fat (g)            | 0.44           | 0.61            | 0.68 (0.58, 0.77)               | 0.65 | 0.45            | 0.51            | 0.68 (0.52, 0.79)               | 0.25 |
| Polyunsaturated fat (g)      | 0.23           | 0.47            | 0.57 (0.43, 0.68)               | 0.48 | 0.32            | 0.45            | 0.70 (0.45, 0.85)               | 0.14 |
| Monounsaturated fat (g)      | 0.36           | 0.46            | 0.55 (0.41, 0.66)               | 0.55 | 0.34            | 0.40            | 0.55 (0.37, 0.68)               | 0.21 |
| Arachadonic FA (g)           | 0.28           | 0.38            | 0.46 (0.32, 0.59)               | 0.49 | 0.25            | 0.31            | 0.45 (0.26, 0.60)               | 0.18 |
| Lauric FA (g)                | 0.40           | 0.42            | 0.53 (0.38, 0.65)               | 0.44 | 0.40            | 0.38            | 0.55 (0.36, 0.70)               | 0.18 |
| Linoleic FA (g)              | 0.24           | 0.46            | 0.57 (0.42, 0.68)               | 0.48 | 0.32            | 0.43            | 0.70 (0.43, 0.86)               | 0.13 |
| Linolenic FA (g)             | 0.33           | 0.47            | 0.62 (0.46, 0.74)               | 0.40 | 0.33            | 0.39            | 0.58 (0.37, 0.72)               | 0.17 |
| N-3 (DHA+EPA) FA (g)         | 0.50           | 0.52            | 0.67 (0.51, 0.79)               | 0.41 | 0.29            | 0.31            | 0.62 (0.22, 0.84)               | 0.08 |
| With supplements             | 0.58           | 0.56            | 0.64 (0.53, 0.73)               | 0.59 |                 |                 |                                 |      |
| Oleic FA (g)                 | 0.36           | 0.46            | 0.55 (0.41, 0.65)               | 0.54 | 0.34            | 0.38            | 0.54 (0.36, 0.68)               | 0.20 |
| Cholesterol (mg)             | 0.46           | 0.55            | 0.63 (0.51, 0.72)               | 0.58 | 0.43            | 0.45            | 0.64 (0.44, 0.78)               | 0.19 |
| Protein (g)                  | 0.27           | 0.47            | 0.53 (0.40, 0.63)               | 0.64 | 0.33            | 0.40            | 0.54 (0.37, 0.67)               | 0.22 |
| Carbohydrate (g)             | 0.47           | 0.63            | 0.68 (0.59, 0.75)               | 0.73 | 0.51            | 0.60            | 0.73 (0.60, 0.82)               | 0.34 |
| Total sugar (g)              | 0.57           | 0.70            | 0.75 (0.67, 0.82)               | 0.73 | 0.59            | 0.66            | 0.80 (0.68, 0.87)               | 0.37 |
| Fiber (g)                    | 0.51           | 0.65            | 0.69 (0.60, 0.75)               | 0.79 | 0.46            | 0.54            | 0.65 (0.52, 0.74)               | 0.36 |
| Alcohol (g)                  | 0.85           | 0.77            | 0.83 (0.77, 0.88)               | 0.75 | 0.75            | 0.67            | 0.77 (0.66, 0.84)               | 0.43 |
| Retinol activity eqvts (mcg) | 0.51           | 0.54            | 0.73 (0.55, 0.85)               | 0.37 | 0.37            | 0.38            | 0.65 (0.37, 0.83)               | 0.11 |
| With supplements             | 0.67           | 0.69            | 0.81 (0.70, 0.88)               | 0.58 |                 |                 |                                 |      |
| Alpha carotene (mcg)         | 0.56           | 0.55            | 0.70 (0.55, 0.81)               | 0.44 | 0.44            | 0.41            | 0.67 (0.40, 0.83)               | 0.13 |
| Beta carotene (mcg)          | 0.58           | 0.59            | 0.73 (0.59, 0.83)               | 0.46 | 0.47            | 0.46            | 0.68 (0.46, 0.83)               | 0.16 |
| With supplements             | 0.55           | 0.55            | 0.70 (0.55, 0.81)               | 0.44 |                 |                 |                                 |      |
| Lutein-zeaxanthin (mcg)      | 0.54           | 0.57            | 0.70 (0.57, 0.80)               | 0.50 | 0.48            | 0.50            | 0.70 (0.51, 0.83)               | 0.19 |
| Lycopene (mcg)               | 0.47           | 0.45            | 0.68 (0.44, 0.82)               | 0.29 | 0.31            | 0.24            | 0.42 (0.17, 0.61)               | 0.11 |
| Beta cryptoxanthin (mcg)     | 0.32           | 0.32            | 0.48 (0.28, 0.65)               | 0.28 | 0.43            | 0.38            | 0.53 (0.35, 0.67)               | 0.20 |

**Web Table 8 (continued): Spearman correlation coefficient for comparison of daily nutrient intake from SFFQ2 with the means of two 7DDRs, and four ASA24s, unadjusted, energy-adjusted and de-attenuated results (data provided by 226 U.S. female nurses with complete four ASA24, 2010-2012)**

| Nutrient                   | SFFQ2 vs. 7DDR |                 |                           |              |      | SFFQ2 vs. ASA24 |                 |                           |              |      |
|----------------------------|----------------|-----------------|---------------------------|--------------|------|-----------------|-----------------|---------------------------|--------------|------|
|                            | Un-adjusted    | Energy-adjusted |                           |              | ICC  | Un-adjusted     | Energy-adjusted |                           |              | ICC  |
|                            |                | Residual method | De-attenuated (ρ & 95%CI) |              |      |                 | Residual method | De-attenuated (ρ & 95%CI) |              |      |
| Vitamin B2 (mg)            | 0.39           | 0.52            | 0.61                      | (0.48, 0.71) | 0.55 | 0.39            | 0.44            | 0.62                      | (0.43, 0.77) | 0.19 |
| With supplements           | 0.70           | 0.71            | 0.78                      | (0.69, 0.84) | 0.72 |                 |                 |                           |              |      |
| Vitamin B2 (mg)            | 0.52           | 0.59            | 0.64                      | (0.53, 0.72) | 0.72 | 0.51            | 0.56            | 0.71                      | (0.57, 0.81) | 0.30 |
| With supplements           | 0.70           | 0.73            | 0.79                      | (0.71, 0.85) | 0.75 |                 |                 |                           |              |      |
| Vitamin B3 (mg)            | 0.29           | 0.41            | 0.48                      | (0.34, 0.59) | 0.55 | 0.34            | 0.37            | 0.56                      | (0.36, 0.71) | 0.16 |
| With supplements           | 0.66           | 0.70            | 0.77                      | (0.68, 0.83) | 0.71 |                 |                 |                           |              |      |
| Vitamin B6 (mg)            | 0.32           | 0.47            | 0.55                      | (0.42, 0.66) | 0.55 | 0.37            | 0.36            | 0.54                      | (0.34, 0.69) | 0.17 |
| With supplements           | 0.65           | 0.66            | 0.71                      | (0.62, 0.79) | 0.73 |                 |                 |                           |              |      |
| Vitamin B12 (mg)           | 0.37           | 0.44            | 0.54                      | (0.39, 0.66) | 0.46 | 0.26            | 0.29            | 0.54                      | (0.23, 0.75) | 0.09 |
| With supplements           | 0.68           | 0.69            | 0.75                      | (0.66, 0.81) | 0.73 |                 |                 |                           |              |      |
| Natural folate (mcg)       | 0.53           | 0.64            | 0.72                      | (0.62, 0.80) | 0.66 | 0.48            | 0.53            | 0.65                      | (0.52, 0.75) | 0.33 |
| Folic acid (mcg)           | 0.56           | 0.61            | 0.71                      | (0.60, 0.80) | 0.59 | 0.51            | 0.51            | 0.70                      | (0.52, 0.82) | 0.22 |
| With supplements           | 0.67           | 0.69            | 0.73                      | (0.65, 0.80) | 0.79 |                 |                 |                           |              |      |
| Dietary folate eqvts (mcg) | 0.44           | 0.54            | 0.62                      | (0.50, 0.71) | 0.59 | 0.42            | 0.48            | 0.71                      | (0.50, 0.84) | 0.18 |
| With supplements           | 0.64           | 0.68            | 0.73                      | (0.64, 0.80) | 0.79 |                 |                 |                           |              |      |
| Vitamin C (mg)             | 0.55           | 0.55            | 0.63                      | (0.51, 0.72) | 0.61 | 0.54            | 0.50            | 0.65                      | (0.49, 0.77) | 0.26 |
| With supplements           | 0.72           | 0.71            | 0.76                      | (0.68, 0.83) | 0.75 |                 |                 |                           |              |      |
| Vitamin D (mg)             | 0.57           | 0.60            | 0.72                      | (0.59, 0.81) | 0.54 | 0.51            | 0.52            | 0.73                      | (0.53, 0.85) | 0.20 |
| With supplements           | 0.64           | 0.61            | 0.66                      | (0.56, 0.73) | 0.75 |                 |                 |                           |              |      |
| Vitamin E (mg)             | 0.38           | 0.42            | 0.52                      | (0.37, 0.65) | 0.44 | 0.34            | 0.36            | 0.52                      | (0.33, 0.66) | 0.18 |
| With supplements           | 0.73           | 0.72            | 0.76                      | (0.69, 0.82) | 0.80 |                 |                 |                           |              |      |
| Vitamin K (mg)             | 0.54           | 0.60            | 0.73                      | (0.60, 0.82) | 0.51 | 0.43            | 0.45            | 0.70                      | (0.46, 0.85) | 0.15 |
| With supplements           | 0.49           | 0.55            | 0.65                      | (0.52, 0.75) | 0.53 |                 |                 |                           |              |      |
| Calcium (mg)               | 0.57           | 0.63            | 0.69                      | (0.59, 0.77) | 0.72 | 0.49            | 0.50            | 0.69                      | (0.50, 0.81) | 0.21 |
| With supplements           | 0.66           | 0.66            | 0.72                      | (0.62, 0.79) | 0.71 |                 |                 |                           |              |      |

**Web Table 8 (continued): Spearman correlation coefficient for comparison of daily nutrient intake from SFFQ2 with the means of two 7DDRs, and four ASA24s, unadjusted and energy-adjusted and de-attenuated results (data provided by 226 U.S. female nurses with complete four ASA24, 2010-2012)**

| Nutrient         | SFFQ2 vs. 7DDR |                 |                           |  | SFFQ2 vs. ASA24 |                 |                           |                   |     |      |
|------------------|----------------|-----------------|---------------------------|--|-----------------|-----------------|---------------------------|-------------------|-----|------|
|                  | Un-adjusted    | Energy-adjusted |                           |  | Un-adjusted     | Energy-adjusted |                           |                   |     |      |
|                  |                | Residual method | De-attenuated (ρ & 95%CI) |  |                 | Residual method | De-attenuated (ρ & 95%CI) |                   | ICC |      |
| Magnesium (mg)   | 0.44           | 0.68            | 0.72 (0.64, 0.80)         |  | 0.77            | 0.40            | 0.60                      | 0.72 (0.60, 0.81) |     | 0.37 |
| With supplements | 0.58           | 0.70            | 0.74 (0.66, 0.81)         |  | 0.81            |                 |                           |                   |     |      |
| Iron (mg)        | 0.32           | 0.49            | 0.59 (0.45, 0.69)         |  | 0.52            | 0.34            | 0.37                      | 0.55 (0.36, 0.70) |     | 0.16 |
| With supplements | 0.37           | 0.48            | 0.55 (0.42, 0.65)         |  | 0.62            |                 |                           |                   |     |      |
| Copper (mg)      | 0.42           | 0.53            | 0.64 (0.51, 0.73)         |  | 0.53            | 0.38            | 0.41                      | 0.54 (0.37, 0.66) |     | 0.25 |
| With supplements | 0.56           | 0.62            | 0.71 (0.60, 0.79)         |  | 0.63            |                 |                           |                   |     |      |
| Zinc (mg)        | 0.30           | 0.43            | 0.52 (0.37, 0.63)         |  | 0.51            | 0.24            | 0.28                      | 0.52 (0.22, 0.73) |     | 0.09 |
| With supplements | 0.65           | 0.67            | 0.73 (0.64, 0.80)         |  | 0.72            |                 |                           |                   |     |      |
| Phosphorus (mg)  | 0.37           | 0.62            | 0.69 (0.59, 0.77)         |  | 0.69            | 0.39            | 0.56                      | 0.74 (0.58, 0.85) |     | 0.24 |
| With supplements | 0.38           | 0.60            | 0.66 (0.56, 0.74)         |  | 0.71            |                 |                           |                   |     |      |
| Choline (mg)     | 0.40           | 0.60            | 0.67 (0.57, 0.75)         |  | 0.64            | 0.42            | 0.45                      | 0.62 (0.44, 0.74) |     | 0.22 |
| With supplements | 0.40           | 0.59            | 0.67 (0.56, 0.77)         |  | 0.62            |                 |                           |                   |     |      |
| Potassium (mg)   | 0.45           | 0.64            | 0.69 (0.60, 0.77)         |  | 0.77            | 0.48            | 0.57                      | 0.69 (0.56, 0.78) |     | 0.37 |
| With supplements | 0.46           | 0.65            | 0.69 (0.60, 0.77)         |  | 0.78            |                 |                           |                   |     |      |
| Sodium (mg)      | 0.27           | 0.46            | 0.54 (0.41, 0.65)         |  | 0.56            | 0.29            | 0.32                      | 0.45 (0.27, 0.59) |     | 0.20 |
| Caffeine (mg)    | 0.76           | 0.75            | 0.77 (0.70, 0.83)         |  | 0.88            | 0.71            | 0.71                      | 0.79 (0.70, 0.85) |     | 0.51 |

Abbreviations: CI, confidence interval; ICC, intra class correlation; FA, fatty acid; Eqvts, equivalents; SFFQ, The semi-quantitative food frequency questionnaire; 7DDR, 7 Day Dietary Records; ASA24, Web-based, automated-self-administered 24-hour dietary recall.



**Web Table 9: Spearman correlation coefficient for comparison of daily nutrient intake from SFFQ2 with the means of two 7DDR, and four ASA24s, unadjusted, adjusted and de-attenuated results (data provided by 309 U.S. female nurses aged 45-60 years, 2010-2012)**

| Nutrient                     | SFFQ2 vs. 7DDR |                 |                                 |      | SFFQ2 vs. ASA24 |                 |                                 |      |
|------------------------------|----------------|-----------------|---------------------------------|------|-----------------|-----------------|---------------------------------|------|
|                              | Un-adjusted    | Energy-adjusted |                                 |      | Un-adjusted     | Energy-adjusted |                                 |      |
|                              |                | Residual method | De-attenuated ( $\rho$ & 95%CI) | ICC  |                 | Residual method | De-attenuated ( $\rho$ & 95%CI) | ICC  |
| Total energy (kcal)          | 0.31           |                 | 0.36 (0.24, 0.46)               | 0.61 | 0.32            |                 | 0.40 (0.27, 0.52)               | 0.32 |
| Total fat (g)                | 0.36           | 0.59            | 0.66 (0.57, 0.73)               | 0.66 | 0.33            | 0.54            | 0.75 (0.55, 0.87)               | 0.20 |
| Saturated fat (g)            | 0.47           | 0.59            | 0.66 (0.57, 0.73)               | 0.65 | 0.44            | 0.54            | 0.76 (0.60, 0.86)               | 0.23 |
| Polyunsaturated fat (g)      | 0.24           | 0.45            | 0.54 (0.42, 0.64)               | 0.50 | 0.20            | 0.35            | 0.54 (0.32, 0.71)               | 0.12 |
| Monounsaturated fat (g)      | 0.36           | 0.45            | 0.52 (0.40, 0.61)               | 0.61 | 0.29            | 0.38            | 0.58 (0.41, 0.70)               | 0.20 |
| Arachadonic FA (g)           | 0.40           | 0.47            | 0.56 (0.44, 0.65)               | 0.53 | 0.21            | 0.32            | 0.44 (0.26, 0.60)               | 0.18 |
| Lauric FA (g)                | 0.38           | 0.38            | 0.48 (0.35, 0.59)               | 0.44 | 0.29            | 0.30            | 0.44 (0.27, 0.58)               | 0.21 |
| Linoleic FA (g)              | 0.24           | 0.41            | 0.50 (0.37, 0.60)               | 0.50 | 0.20            | 0.33            | 0.52 (0.31, 0.68)               | 0.13 |
| Linolenic FA (g)             | 0.36           | 0.49            | 0.62 (0.49, 0.72)               | 0.44 | 0.25            | 0.27            | 0.48 (0.23, 0.67)               | 0.11 |
| N-3 (DHA+EPA) FA (g)         | 0.54           | 0.52            | 0.68 (0.54, 0.79)               | 0.39 | 0.30            | 0.33            | 0.61 (0.26, 0.82)               | 0.09 |
| With supplements             | 0.62           | 0.60            | 0.69 (0.59, 0.77)               | 0.59 |                 |                 |                                 |      |
| Oleic FA (g)                 | 0.36           | 0.45            | 0.51 (0.40, 0.61)               | 0.60 | 0.30            | 0.38            | 0.58 (0.41, 0.71)               | 0.19 |
| Cholesterol (mg)             | 0.50           | 0.54            | 0.62 (0.52, 0.70)               | 0.60 | 0.36            | 0.39            | 0.61 (0.42, 0.74)               | 0.18 |
| Protein (g)                  | 0.37           | 0.53            | 0.61 (0.50, 0.69)               | 0.60 | 0.29            | 0.39            | 0.46 (0.29, 0.60)               | 0.22 |
| Carbohydrate (g)             | 0.44           | 0.66            | 0.71 (0.63, 0.77)               | 0.74 | 0.44            | 0.56            | 0.68 (0.55, 0.77)               | 0.34 |
| Total sugar (g)              | 0.52           | 0.65            | 0.70 (0.62, 0.77)               | 0.73 | 0.53            | 0.61            | 0.72 (0.61, 0.81)               | 0.36 |
| Fiber (g)                    | 0.54           | 0.64            | 0.70 (0.62, 0.77)               | 0.72 | 0.44            | 0.48            | 0.59 (0.46, 0.70)               | 0.31 |
| Alcohol (g)                  | 0.85           | 0.75            | 0.83 (0.77, 0.88)               | 0.69 | 0.73            | 0.61            | 0.74 (0.63, 0.82)               | 0.38 |
| Retinol activity eqvts (mcg) | 0.52           | 0.53            | 0.75 (0.57, 0.87)               | 0.33 | 0.41            | 0.43            | 0.62 (0.43, 0.75)               | 0.18 |
| With supplements             | 0.60           | 0.61            | 0.70 (0.61, 0.78)               | 0.59 |                 |                 |                                 |      |
| Alpha carotene (mcg)         | 0.56           | 0.50            | 0.67 (0.52, 0.78)               | 0.37 | 0.39            | 0.33            | 0.54 (0.26, 0.74)               | 0.11 |
| Beta carotene (mcg)          | 0.59           | 0.56            | 0.72 (0.59, 0.82)               | 0.43 | 0.49            | 0.45            | 0.72 (0.52, 0.85)               | 0.17 |
| With supplements             | 0.58           | 0.56            | 0.71 (0.58, 0.80)               | 0.44 |                 |                 |                                 |      |
| Lutein-zeaxanthin (mcg)      | 0.60           | 0.60            | 0.73 (0.62, 0.82)               | 0.50 | 0.50            | 0.52            | 0.66 (0.45, 0.81)               | 0.19 |
| Lycopene (mcg)               | 0.37           | 0.37            | 0.70 (0.32, 0.89)               | 0.15 | 0.28            | 0.19            | 0.49 (0.18, 0.71)               | 0.08 |
| Beta cryptoxanthin (mcg)     | 0.28           | 0.28            | 0.41 (0.24, 0.55)               | 0.30 | 0.37            | 0.36            | 0.62 (0.28, 0.83)               | 0.09 |

**Web Table 9 (continued): Spearman correlation coefficient for comparison of daily nutrient intake from SFFQ2 with the means of two 7DDRs, and four ASA24s, unadjusted, adjusted and de-attenuated results (data provided by 309 U.S. female nurses aged 45-60 years, 2010-2012)**

| Nutrient                   | SFFQ2 vs. 7DDR |                 |                                 |              |      | SFFQ2 vs. ASA24 |                 |                                 |              |      |
|----------------------------|----------------|-----------------|---------------------------------|--------------|------|-----------------|-----------------|---------------------------------|--------------|------|
|                            | Un-adjusted    | Energy-adjusted |                                 |              | ICC  | Un-adjusted     | Energy-adjusted |                                 |              | ICC  |
|                            |                | Residual method | De-attenuated ( $\rho$ & 95%CI) |              |      |                 | Residual method | De-attenuated ( $\rho$ & 95%CI) |              |      |
| Vitamin B1 (mg)            | 0.41           | 0.53            | 0.64                            | (0.53, 0.73) | 0.51 | 0.37            | 0.46            | 0.69                            | (0.52, 0.82) | 0.19 |
| With supplements           | 0.65           | 0.66            | 0.72                            | (0.64, 0.79) | 0.70 |                 |                 |                                 |              |      |
| Vitamin B2 (mg)            | 0.54           | 0.61            | 0.67                            | (0.58, 0.73) | 0.70 | 0.50            | 0.67            | 0.65                            | (0.51, 0.75) | 0.33 |
| With supplements           | 0.67           | 0.69            | 0.75                            | (0.68, 0.81) | 0.75 |                 |                 |                                 |              |      |
| Vitamin B3 (mg)            | 0.40           | 0.46            | 0.54                            | (0.43, 0.63) | 0.56 | 0.32            | 0.41            | 0.63                            | (0.37, 0.8)  | 0.14 |
| With supplements           | 0.62           | 0.66            | 0.72                            | (0.64, 0.79) | 0.69 |                 |                 |                                 |              |      |
| Vitamin B6 (mg)            | 0.41           | 0.47            | 0.55                            | (0.44, 0.64) | 0.57 | 0.30            | 0.32            | 0.47                            | (0.30, 0.61) | 0.19 |
| With supplements           | 0.60           | 0.60            | 0.65                            | (0.57, 0.72) | 0.69 |                 |                 |                                 |              |      |
| Vitamin B12 (mg)           | 0.43           | 0.44            | 0.55                            | (0.42, 0.65) | 0.45 | 0.35            | 0.34            | 0.43                            | (0.14, 0.65) | 0.11 |
| With supplements           | 0.64           | 0.64            | 0.70                            | (0.62, 0.77) | 0.68 |                 |                 |                                 |              |      |
| Natural folate (mcg)       | 0.54           | 0.63            | 0.72                            | (0.63, 0.79) | 0.61 | 0.48            | 0.53            | 0.67                            | (0.55, 0.77) | 0.32 |
| Folic acid (mcg)           | 0.52           | 0.54            | 0.63                            | (0.52, 0.71) | 0.60 | 0.44            | 0.43            | 0.54                            | (0.36, 0.68) | 0.21 |
| With supplements           | 0.64           | 0.65            | 0.72                            | (0.63, 0.79) | 0.68 |                 |                 |                                 |              |      |
| Dietary folate eqvts (mcg) | 0.45           | 0.50            | 0.58                            | (0.47, 0.67) | 0.57 | 0.40            | 0.41            | 0.56                            | (0.38, 0.70) | 0.20 |
| With supplements           | 0.64           | 0.66            | 0.72                            | (0.64, 0.79) | 0.69 |                 |                 |                                 |              |      |
| Vitamin C (mg)             | 0.47           | 0.51            | 0.60                            | (0.49, 0.69) | 0.53 | 0.54            | 0.48            | 0.66                            | (0.50, 0.78) | 0.23 |
| With supplements           | 0.65           | 0.66            | 0.73                            | (0.64, 0.79) | 0.68 |                 |                 |                                 |              |      |
| Vitamin D (mg)             | 0.65           | 0.65            | 0.75                            | (0.66, 0.82) | 0.58 | 0.53            | 0.54            | 0.69                            | (0.47, 0.83) | 0.20 |
| With supplements           | 0.63           | 0.61            | 0.65                            | (0.57, 0.72) | 0.77 |                 |                 |                                 |              |      |
| Vitamin E (mg)             | 0.37           | 0.46            | 0.55                            | (0.43, 0.64) | 0.52 | 0.30            | 0.36            | 0.49                            | (0.34, 0.61) | 0.25 |
| With supplements           | 0.71           | 0.71            | 0.77                            | (0.70, 0.83) | 0.72 |                 |                 |                                 |              |      |
| Vitamin K (mg)             | 0.57           | 0.60            | 0.76                            | (0.64, 0.85) | 0.45 | 0.44            | 0.44            | 0.64                            | (0.43, 0.78) | 0.18 |
| With supplements           | 0.59           | 0.61            | 0.76                            | (0.64, 0.84) | 0.48 |                 |                 |                                 |              |      |
| Calcium (mg)               | 0.60           | 0.65            | 0.71                            | (0.63, 0.78) | 0.70 | 0.51            | 0.56            | 0.66                            | (0.50, 0.78) | 0.27 |
| With supplements           | 0.65           | 0.66            | 0.72                            | (0.64, 0.79) | 0.71 |                 |                 |                                 |              |      |

**Web Table 9 (continued): Spearman correlation coefficient for comparison of daily nutrient intake from SFFQ2 with the means of two 7DDRs, and four ASA24s, unadjusted, adjusted and de-attenuated results (data provided by 309 U.S. female nurses aged 45-60 years, 2010-2012)**

| Nutrient         | SFFQ2 vs. 7DDR |                 |                                 |              |      | SFFQ2 vs. ASA24 |                 |                                 |              |      |
|------------------|----------------|-----------------|---------------------------------|--------------|------|-----------------|-----------------|---------------------------------|--------------|------|
|                  | Un-adjusted    | Energy-adjusted |                                 |              | ICC  | Un-adjusted     | Energy-adjusted |                                 |              | ICC  |
|                  |                | Residual method | De-attenuated ( $\rho$ & 95%CI) |              |      |                 | Residual method | De-attenuated ( $\rho$ & 95%CI) |              |      |
| Magnesium (mg)   | 0.48           | 0.68            | 0.74                            | (0.66, 0.80) | 0.73 | 0.38            | 0.57            | 0.71                            | (0.59, 0.80) | 0.37 |
| With supplements | 0.56           | 0.69            | 0.74                            | (0.67, 0.80) | 0.75 |                 |                 |                                 |              |      |
| Iron (mg)        | 0.40           | 0.44            | 0.52                            | (0.40, 0.62) | 0.53 | 0.32            | 0.37            | 0.61                            | (0.41, 0.75) | 0.16 |
| With supplements | 0.50           | 0.53            | 0.62                            | (0.51, 0.70) | 0.58 |                 |                 |                                 |              |      |
| Copper (mg)      | 0.36           | 0.47            | 0.55                            | (0.43, 0.64) | 0.56 | 0.28            | 0.34            | 0.48                            | (0.33, 0.61) | 0.24 |
| With supplements | 0.46           | 0.52            | 0.58                            | (0.48, 0.67) | 0.62 |                 |                 |                                 |              |      |
| Zinc (mg)        | 0.43           | 0.46            | 0.58                            | (0.45, 0.68) | 0.45 | 0.34            | 0.28            | 0.46                            | (0.27, 0.62) | 0.15 |
| With supplements | 0.54           | 0.53            | 0.59                            | (0.49, 0.67) | 0.66 |                 |                 |                                 |              |      |
| Phosphorus (mg)  | 0.45           | 0.61            | 0.67                            | (0.59, 0.74) | 0.67 | 0.35            | 0.50            | 0.61                            | (0.43, 0.74) | 0.23 |
| With supplements | 0.45           | 0.62            | 0.69                            | (0.60, 0.75) | 0.68 |                 |                 |                                 |              |      |
| Choline (mg)     | 0.49           | 0.58            | 0.66                            | (0.57, 0.73) | 0.63 | 0.35            | 0.41            | 0.53                            | (0.36, 0.66) | 0.22 |
| With supplements | 0.48           | 0.59            | 0.67                            | (0.58, 0.75) | 0.61 |                 |                 |                                 |              |      |
| Potassium (mg)   | 0.51           | 0.65            | 0.71                            | (0.63, 0.78) | 0.72 | 0.46            | 0.55            | 0.60                            | (0.48, 0.70) | 0.37 |
| With supplements | 0.51           | 0.65            | 0.71                            | (0.63, 0.78) | 0.71 |                 |                 |                                 |              |      |
| Sodium (mg)      | 0.28           | 0.41            | 0.49                            | (0.37, 0.59) | 0.51 | 0.24            | 0.20            | 0.31                            | (0.13, 0.46) | 0.18 |
| Caffeine (mg)    | 0.81           | 0.78            | 0.81                            | (0.77, 0.85) | 0.87 | 0.75            | 0.75            | 0.80                            | (0.71, 0.86) | 0.49 |

Abbreviations: CI, confidence interval; ICC, intra class correlation; FA, fatty acid; Eqvts, equivalents; SFFQ, The semi-quantitative food frequency questionnaire; 7DDR, 7 Day Dietary Records; ASA24, Web-based, automated-self-administered 24-hour dietary recall.

**Web Table 10: Spearman correlation coefficient for comparison of daily nutrient intake from SFFQ2 with the means of two 7DDRs, and four ASA24s, unadjusted and energy-adjusted and de-attenuated results (data provided by 323 U.S. female nurses aged 61-80 years, 2010-2012)**

| Nutrient                     | SFFQ2 vs. 7DDR |                 |                                 |      | SFFQ2 vs. ASA24 |                 |                                 |      |
|------------------------------|----------------|-----------------|---------------------------------|------|-----------------|-----------------|---------------------------------|------|
|                              | Un-adjusted    | Energy-adjusted |                                 |      | Un-adjusted     | Energy-adjusted |                                 |      |
|                              |                | Residual method | De-attenuated ( $\rho$ & 95%CI) |      |                 | Residual method | De-attenuated ( $\rho$ & 95%CI) |      |
| Total energy (kcal)          | 0.24           |                 | 0.27 (0.16, 0.37)               | 0.65 | 0.30            |                 | 0.40 (0.26, 0.53)               | 0.27 |
| Total fat (g)                | 0.35           | 0.59            | 0.67 (0.57, 0.73)               | 0.63 | 0.36            | 0.62            | 0.69 (0.49, 0.82)               | 0.25 |
| Saturated fat (g)            | 0.41           | 0.62            | 0.70 (0.61, 0.77)               | 0.64 | 0.43            | 0.61            | 0.59 (0.42, 0.72)               | 0.26 |
| Polyunsaturated fat (g)      | 0.33           | 0.49            | 0.61 (0.49, 0.70)               | 0.47 | 0.30            | 0.52            | 0.68 (0.14, 0.90)               | 0.12 |
| Monounsaturated fat (g)      | 0.37           | 0.52            | 0.61 (0.50, 0.69)               | 0.56 | 0.31            | 0.43            | 0.62 (0.44, 0.74)               | 0.21 |
| Arachadonic FA (g)           | 0.32           | 0.40            | 0.48 (0.37, 0.58)               | 0.50 | 0.30            | 0.34            | 0.58 (0.37, 0.73)               | 0.14 |
| Lauric FA (g)                | 0.31           | 0.34            | 0.43 (0.30, 0.55)               | 0.41 | 0.39            | 0.36            | 0.51 (0.35, 0.64)               | 0.22 |
| Linoleic FA (g)              | 0.35           | 0.50            | 0.61 (0.49, 0.70)               | 0.48 | 0.32            | 0.53            | 0.64 (0.06, 0.90)               | 0.12 |
| Linolenic FA (g)             | 0.34           | 0.41            | 0.52 (0.39, 0.62)               | 0.44 | 0.29            | 0.42            | 0.56 (0.34, 0.73)               | 0.15 |
| N-3 (DHA+EPA) FA (g)         | 0.52           | 0.51            | 0.66 (0.53, 0.75)               | 0.42 | 0.25            | 0.27            | 0.58 (0.18, 0.82)               | 0.07 |
| With supplements             | 0.62           | 0.60            | 0.67 (0.58, 0.74)               | 0.65 |                 |                 |                                 |      |
| Oleic FA (g)                 | 0.37           | 0.51            | 0.60 (0.49, 0.68)               | 0.55 | 0.31            | 0.42            | 0.61 (0.43, 0.74)               | 0.20 |
| Cholesterol (mg)             | 0.49           | 0.59            | 0.69 (0.60, 0.78)               | 0.56 | 0.44            | 0.47            | 0.70 (0.43, 0.86)               | 0.14 |
| Protein (g)                  | 0.27           | 0.43            | 0.49 (0.38, 0.58)               | 0.63 | 0.31            | 0.37            | 0.57 (0.39, 0.70)               | 0.20 |
| Carbohydrate (g)             | 0.38           | 0.66            | 0.71 (0.63, 0.77)               | 0.74 | 0.45            | 0.66            | 0.74 (0.61, 0.83)               | 0.34 |
| Total sugar (g)              | 0.54           | 0.71            | 0.76 (0.69, 0.82)               | 0.78 | 0.56            | 0.67            | 0.76 (0.65, 0.84)               | 0.39 |
| Fiber (g)                    | 0.38           | 0.59            | 0.63 (0.55, 0.70)               | 0.78 | 0.39            | 0.56            | 0.68 (0.56, 0.78)               | 0.35 |
| Alcohol (g)                  | 0.86           | 0.77            | 0.83 (0.78, 0.88)               | 0.75 | 0.78            | 0.70            | 0.75 (0.67, 0.82)               | 0.53 |
| Retinol activity eqvts (mcg) | 0.38           | 0.45            | 0.58 (0.45, 0.68)               | 0.41 | 0.38            | 0.40            | 0.50 (0.32, 0.65)               | 0.20 |
| With supplements             | 0.65           | 0.67            | 0.74 (0.66, 0.81)               | 0.67 |                 |                 |                                 |      |
| Alpha carotene (mcg)         | 0.43           | 0.45            | 0.61 (0.46, 0.71)               | 0.37 | 0.40            | 0.42            | 0.61 (0.40, 0.75)               | 0.18 |
| Beta carotene (mcg)          | 0.42           | 0.47            | 0.59 (0.46, 0.69)               | 0.45 | 0.39            | 0.43            | 0.60 (0.43, 0.72)               | 0.23 |
| With supplements             | 0.40           | 0.43            | 0.53 (0.40, 0.63)               | 0.47 |                 |                 |                                 |      |
| Lutein-zeaxanthin (mcg)      | 0.47           | 0.50            | 0.61 (0.50, 0.70)               | 0.50 | 0.40            | 0.45            | 0.65 (0.49, 0.77)               | 0.23 |
| Lycopene (mcg)               | 0.42           | 0.38            | 0.55 (0.38, 0.68)               | 0.30 | 0.18            | 0.13            | 0.21 (0.03, 0.38)               | 0.16 |
| Beta cryptoxanthin (mcg)     | 0.41           | 0.43            | 0.64 (0.46, 0.77)               | 0.30 | 0.42            | 0.45            | 0.56 (0.38, 0.70)               | 0.22 |

**Web Table 10 (continued): Spearman correlation coefficient for comparison of daily nutrient intake from SFFQ2 with the means of two 7DDRs, and four ASA24s, unadjusted and energy-adjusted and de-attenuated results (data provided by 323 U.S. female nurses aged 61-80 years, 2010-2012)**

| Nutrient                   | SFFQ2 vs. 7DDR |                 |                                 |              |      | SFFQ2 vs. ASA24 |                 |                                 |              |      |
|----------------------------|----------------|-----------------|---------------------------------|--------------|------|-----------------|-----------------|---------------------------------|--------------|------|
|                            | Un-adjusted    | Energy-adjusted |                                 |              | ICC  | Un-adjusted     | Energy-adjusted |                                 |              | ICC  |
|                            |                | Residual method | De-attenuated ( $\rho$ & 95%CI) |              |      |                 | Residual method | De-attenuated ( $\rho$ & 95%CI) |              |      |
| Vitamin B1 (mg)            | 0.31           | 0.54            | 0.65                            | (0.54, 0.73) | 0.52 | 0.28            | 0.39            | 0.57                            | (0.37, 0.71) | 0.18 |
| With supplements           | 0.74           | 0.75            | 0.82                            | (0.75, 0.87) | 0.71 |                 |                 |                                 |              |      |
| Vitamin B2 (mg)            | 0.49           | 0.61            | 0.68                            | (0.59, 0.74) | 0.68 | 0.45            | 0.51            | 0.67                            | (0.53, 0.78) | 0.30 |
| With supplements           | 0.74           | 0.76            | 0.82                            | (0.75, 0.86) | 0.74 |                 |                 |                                 |              |      |
| Vitamin B3 (mg)            | 0.30           | 0.46            | 0.55                            | (0.43, 0.64) | 0.52 | 0.27            | 0.35            | 0.52                            | (0.35, 0.66) | 0.20 |
| With supplements           | 0.72           | 0.74            | 0.80                            | (0.74, 0.85) | 0.73 |                 |                 |                                 |              |      |
| Vitamin B6 (mg)            | 0.36           | 0.49            | 0.57                            | (0.46, 0.65) | 0.58 | 0.36            | 0.45            | 0.63                            | (0.43, 0.77) | 0.19 |
| With supplements           | 0.74           | 0.75            | 0.81                            | (0.74, 0.85) | 0.74 |                 |                 |                                 |              |      |
| Vitamin B12 (mg)           | 0.44           | 0.46            | 0.56                            | (0.44, 0.65) | 0.51 | 0.31            | 0.32            | 0.57                            | (0.35, 0.73) | 0.12 |
| With supplements           | 0.71           | 0.69            | 0.75                            | (0.67, 0.81) | 0.73 |                 |                 |                                 |              |      |
| Natural folate (mcg)       | 0.41           | 0.55            | 0.61                            | (0.51, 0.68) | 0.68 | 0.35            | 0.46            | 0.60                            | (0.47, 0.70) | 0.33 |
| Folic acid (mcg)           | 0.59           | 0.64            | 0.74                            | (0.65, 0.81) | 0.59 | 0.48            | 0.47            | 0.56                            | (0.40, 0.68) | 0.26 |
| With supplements           | 0.72           | 0.72            | 0.78                            | (0.71, 0.83) | 0.74 |                 |                 |                                 |              |      |
| Dietary folate eqvts (mcg) | 0.46           | 0.60            | 0.71                            | (0.61, 0.79) | 0.56 | 0.32            | 0.39            | 0.51                            | (0.34, 0.64) | 0.22 |
| With supplements           | 0.71           | 0.74            | 0.79                            | (0.73, 0.84) | 0.78 |                 |                 |                                 |              |      |
| Vitamin C (mg)             | 0.49           | 0.51            | 0.59                            | (0.48, 0.67) | 0.60 | 0.42            | 0.42            | 0.56                            | (0.43, 0.67) | 0.32 |
| With supplements           | 0.75           | 0.75            | 0.80                            | (0.74, 0.85) | 0.78 |                 |                 |                                 |              |      |
| Vitamin D (mg)             | 0.55           | 0.53            | 0.62                            | (0.52, 0.70) | 0.57 | 0.54            | 0.52            | 0.74                            | (0.55, 0.85) | 0.21 |
| With supplements           | 0.59           | 0.55            | 0.62                            | (0.52, 0.69) | 0.64 |                 |                 |                                 |              |      |
| Vitamin E (mg)             | 0.43           | 0.47            | 0.56                            | (0.45, 0.65) | 0.54 | 0.30            | 0.35            | 0.53                            | (0.37, 0.66) | 0.21 |
| With supplements           | 0.73           | 0.72            | 0.77                            | (0.70, 0.82) | 0.79 |                 |                 |                                 |              |      |
| Vitamin K (mg)             | 0.50           | 0.54            | 0.65                            | (0.54, 0.74) | 0.51 | 0.30            | 0.38            | 0.60                            | (0.40, 0.74) | 0.17 |
| With supplements           | 0.47           | 0.50            | 0.58                            | (0.48, 0.67) | 0.57 |                 |                 |                                 |              |      |
| Calcium (mg)               | 0.51           | 0.61            | 0.68                            | (0.59, 0.74) | 0.69 | 0.48            | 0.57            | 0.71                            | (0.54, 0.83) | 0.25 |
| With supplements           | 0.65           | 0.67            | 0.73                            | (0.66, 0.80) | 0.72 |                 |                 |                                 |              |      |

**Web Table 10 (continued): Spearman correlation coefficient for comparison of daily nutrient intake from SFFQ2 with the means of two 7DDRs, and four ASA24s, unadjusted and energy-adjusted and de-attenuated results (data provided by 323 U.S. female nurses aged 61-80 years, 2010-2012)**

| Nutrient         | SFFQ2 vs. 7DDR |                 |                                 |              |      | SFFQ2 vs. ASA24 |                 |                                 |              |      |
|------------------|----------------|-----------------|---------------------------------|--------------|------|-----------------|-----------------|---------------------------------|--------------|------|
|                  | Un-adjusted    | Energy-adjusted |                                 |              | ICC  | Un-adjusted     | Energy-adjusted |                                 |              | ICC  |
|                  |                | Residual method | De-attenuated ( $\rho$ & 95%CI) |              |      |                 | Residual method | De-attenuated ( $\rho$ & 95%CI) |              |      |
| Magnesium (mg)   | 0.38           | 0.64            | 0.69                            | (0.61, 0.74) | 0.74 | 0.35            | 0.58            | 0.74                            | (0.62, 0.82) | 0.37 |
| With supplements | 0.60           | 0.75            | 0.79                            | (0.73, 0.84) | 0.82 |                 |                 |                                 |              |      |
| Iron (mg)        | 0.30           | 0.51            | 0.60                            | (0.49, 0.68) | 0.56 | 0.30            | 0.38            | 0.49                            | (0.33, 0.63) | 0.22 |
| With supplements | 0.30           | 0.42            | 0.55                            | (0.42, 0.66) | 0.40 |                 |                 |                                 |              |      |
| Copper (mg)      | 0.36           | 0.53            | 0.60                            | (0.50, 0.68) | 0.64 | 0.31            | 0.46            | 0.55                            | (0.40, 0.67) | 0.26 |
| With supplements | 0.53           | 0.57            | 0.64                            | (0.55, 0.71) | 0.65 |                 |                 |                                 |              |      |
| Zinc (mg)        | 0.29           | 0.40            | 0.47                            | (0.36, 0.57) | 0.53 | 0.29            | 0.31            | 0.53                            | (0.07, 0.81) | 0.07 |
| With supplements | 0.66           | 0.66            | 0.74                            | (0.66, 0.81) | 0.64 |                 |                 |                                 |              |      |
| Phosphorus (mg)  | 0.37           | 0.59            | 0.66                            | (0.57, 0.72) | 0.69 | 0.39            | 0.53            | 0.71                            | (0.56, 0.82) | 0.26 |
| With supplements | 0.37           | 0.60            | 0.66                            | (0.57, 0.72) | 0.69 |                 |                 |                                 |              |      |
| Choline (mg)     | 0.38           | 0.51            | 0.58                            | (0.48, 0.66) | 0.62 | 0.38            | 0.40            | 0.68                            | (0.46, 0.82) | 0.15 |
| With supplements | 0.36           | 0.48            | 0.54                            | (0.44, 0.63) | 0.63 |                 |                 |                                 |              |      |
| Potassium (mg)   | 0.40           | 0.54            | 0.58                            | (0.49, 0.66) | 0.73 | 0.37            | 0.52            | 0.64                            | (0.52, 0.73) | 0.34 |
| With supplements | 0.39           | 0.53            | 0.58                            | (0.49, 0.65) | 0.74 |                 |                 |                                 |              |      |
| Sodium (mg)      | 0.28           | 0.47            | 0.57                            | (0.45, 0.67) | 0.48 | 0.29            | 0.40            | 0.52                            | 0.35, 0.66)  | 0.21 |
| Caffeine (mg)    | 0.74           | 0.73            | 0.76                            | (0.70, 0.81) | 0.85 | 0.67            | 0.67            | 0.75                            | (0.67, 0.82) | 0.51 |

Abbreviations: CI, confidence interval; ICC, intra class correlation; FA, fatty acid; Eqvts, equivalents; SFFQ, The semi-quantitative food frequency questionnaire; 7DDR, 7 Day Dietary Records; ASA24, Web-based, automated-self-administered 24-hour dietary recall.

**Web Table 11: Spearman correlation coefficient for comparison of daily nutrient intake from SFFQ2 with the means of two 7DDRs, and four ASA24s, unadjusted and energy-adjusted and de-attenuated results (data provided by 298 U.S. female nurses with BMI<25kg/m2 at enrollment, 2010-2012)**

| Nutrient                     | SFFQ2 vs. 7DDR |                 |                           |              |      | SFFQ2 vs. ASA24 |                 |                           |              |      |
|------------------------------|----------------|-----------------|---------------------------|--------------|------|-----------------|-----------------|---------------------------|--------------|------|
|                              | Un-adjusted    | Energy-adjusted |                           |              | ICC  | Un-adjusted     | Energy-adjusted |                           |              | ICC  |
|                              |                | Residual method | De-attenuated (ρ & 95%CI) |              |      |                 | Residual method | De-attenuated (ρ & 95%CI) |              |      |
| Total energy (kcal)          | 0.23           |                 | 0.26                      | (0.14, 0.37) | 0.62 | 0.33            |                 | 0.43                      | (0.27, 0.56) | 0.27 |
| Total fat (g)                | 0.33           | 0.63            | 0.70                      | (0.61, 0.78) | 0.65 | 0.35            | 0.58            | 0.80                      | (0.61, 0.90) | 0.24 |
| Saturated fat (g)            | 0.43           | 0.66            | 0.74                      | (0.65, 0.80) | 0.68 | 0.43            | 0.62            | 0.68                      | (0.49, 0.81) | 0.26 |
| Polyunsaturated fat (g)      | 0.28           | 0.51            | 0.60                      | (0.49, 0.69) | 0.54 | 0.30            | 0.47            | 0.71                      | (0.45, 0.86) | 0.15 |
| Monounsaturated fat (g)      | 0.37           | 0.54            | 0.62                      | (0.52, 0.70) | 0.59 | 0.33            | 0.44            | 0.62                      | (0.44, 0.74) | 0.22 |
| Arachadonic FA (g)           | 0.35           | 0.43            | 0.52                      | (0.40, 0.62) | 0.51 | 0.29            | 0.35            | 0.53                      | (0.33, 0.69) | 0.16 |
| Lauric FA (g)                | 0.30           | 0.35            | 0.44                      | (0.31, 0.55) | 0.47 | 0.31            | 0.38            | 0.48                      | (0.32, 0.62) | 0.24 |
| Linoleic FA (g)              | 0.29           | 0.50            | 0.60                      | (0.48, 0.69) | 0.54 | 0.31            | 0.45            | 0.73                      | (0.46, 0.88) | 0.14 |
| Linolenic FA (g)             | 0.39           | 0.51            | 0.61                      | (0.49, 0.70) | 0.52 | 0.39            | 0.44            | 0.60                      | (0.42, 0.72) | 0.23 |
| N-3 (DHA+EPA) FA (g)         | 0.55           | 0.56            | 0.72                      | (0.59, 0.82) | 0.43 | 0.29            | 0.32            | 0.70                      | (0.25, 0.90) | 0.08 |
| With supplements             | 0.64           | 0.63            | 0.70                      | (0.61, 0.77) | 0.67 |                 |                 |                           |              |      |
| Oleic FA (g)                 | 0.37           | 0.53            | 0.62                      | (0.51, 0.70) | 0.59 | 0.33            | 0.44            | 0.62                      | (0.42, 0.75) | 0.20 |
| Cholesterol (mg)             | 0.48           | 0.57            | 0.67                      | (0.57, 0.75) | 0.56 | 0.44            | 0.48            | 0.62                      | (0.38, 0.78) | 0.18 |
| Protein (g)                  | 0.34           | 0.50            | 0.57                      | (0.47, 0.66) | 0.62 | 0.41            | 0.48            | 0.56                      | (0.36, 0.71) | 0.20 |
| Carbohydrate (g)             | 0.41           | 0.67            | 0.73                      | (0.65, 0.79) | 0.75 | 0.54            | 0.59            | 0.69                      | (0.56, 0.79) | 0.36 |
| Total sugar (g)              | 0.56           | 0.72            | 0.78                      | (0.71, 0.83) | 0.77 | 0.61            | 0.62            | 0.75                      | (0.64, 0.84) | 0.37 |
| Fiber (g)                    | 0.45           | 0.62            | 0.66                      | (0.58, 0.73) | 0.77 | 0.48            | 0.51            | 0.64                      | (0.52, 0.74) | 0.35 |
| Alcohol (g)                  | 0.85           | 0.77            | 0.84                      | (0.78, 0.88) | 0.72 | 0.75            | 0.66            | 0.74                      | (0.65, 0.82) | 0.49 |
| Retinol activity eqvts (mcg) | 0.44           | 0.50            | 0.64                      | (0.51, 0.73) | 0.44 | 0.42            | 0.42            | 0.52                      | (0.35, 0.66) | 0.23 |
| With supplements             | 0.63           | 0.66            | 0.74                      | (0.65, 0.81) | 0.67 |                 |                 |                           |              |      |
| Alpha carotene (mcg)         | 0.47           | 0.45            | 0.60                      | (0.45, 0.70) | 0.39 | 0.37            | 0.33            | 0.48                      | (0.29, 0.64) | 0.18 |
| Beta carotene (mcg)          | 0.51           | 0.55            | 0.71                      | (0.58, 0.81) | 0.42 | 0.45            | 0.43            | 0.58                      | (0.42, 0.70) | 0.25 |
| With supplements             | 0.47           | 0.51            | 0.65                      | (0.52, 0.74) | 0.45 |                 |                 |                           |              |      |
| Lutein-zeaxanthin (mcg)      | 0.58           | 0.62            | 0.74                      | (0.63, 0.82) | 0.51 | 0.51            | 0.50            | 0.69                      | (0.54, 0.80) | 0.27 |
| Lycopene (mcg)               | 0.38           | 0.36            | 0.62                      | (0.37, 0.79) | 0.20 | 0.24            | 0.12            | 0.25                      | (0.05, 0.42) | 0.16 |
| Beta cryptoxanthin (mcg)     | 0.38           | 0.42            | 0.58                      | (0.42, 0.71) | 0.34 | 0.44            | 0.44            | 0.67                      | (0.40, 0.83) | 0.14 |

**Web Table 11 (continued): Spearman correlation coefficient for comparison of daily nutrient intake from SFFQ2 with the means of two 7DDRs, and four ASA24s, unadjusted and energy-adjusted and de-attenuated results (data provided by 298 U.S. female nurses with BMI<25kg/m2 at enrollment, 2010-2012)**

| Nutrient                   | SFFQ2 vs. 7DDR |                 |                           |              |      | SFFQ2 vs. ASA24 |                 |                           |              |      |
|----------------------------|----------------|-----------------|---------------------------|--------------|------|-----------------|-----------------|---------------------------|--------------|------|
|                            | Un-adjusted    | Energy-adjusted |                           |              | ICC  | Un-adjusted     | Energy-adjusted |                           |              | ICC  |
|                            |                | Residual method | De-attenuated (ρ & 95%CI) |              |      |                 | Residual method | De-attenuated (ρ & 95%CI) |              |      |
| Vitamin B1 (mg)            | 0.43           | 0.61            | 0.70                      | (0.61, 0.78) | 0.59 | 0.44            | 0.49            | 0.61                      | (0.41, 0.75) | 0.23 |
| With supplements           | 0.76           | 0.76            | 0.83                      | (0.77, 0.87) | 0.73 |                 |                 |                           |              |      |
| Vitamin B2 (mg)            | 0.58           | 0.65            | 0.71                      | (0.63, 0.78) | 0.72 | 0.58            | 0.57            | 0.72                      | (0.59, 0.82) | 0.32 |
| With supplements           | 0.75           | 0.76            | 0.82                      | (0.77, 0.87) | 0.75 |                 |                 |                           |              |      |
| Vitamin B3 (mg)            | 0.36           | 0.49            | 0.57                      | (0.46, 0.66) | 0.59 | 0.37            | 0.42            | 0.60                      | (0.43, 0.73) | 0.22 |
| With supplements           | 0.71           | 0.73            | 0.78                      | (0.71, 0.83) | 0.80 |                 |                 |                           |              |      |
| Vitamin B6 (mg)            | 0.36           | 0.49            | 0.55                      | (0.45, 0.64) | 0.62 | 0.41            | 0.39            | 0.51                      | (0.35, 0.64) | 0.25 |
| With supplements           | 0.67           | 0.67            | 0.73                      | (0.65, 0.80) | 0.71 |                 |                 |                           |              |      |
| Vitamin B12 (mg)           | 0.46           | 0.49            | 0.57                      | (0.46, 0.67) | 0.55 | 0.38            | 0.36            | 0.63                      | (0.37, 0.80) | 0.13 |
| With supplements           | 0.73           | 0.71            | 0.77                      | (0.70, 0.83) | 0.72 |                 |                 |                           |              |      |
| Natural folate (mcg)       | 0.49           | 0.64            | 0.72                      | (0.63, 0.79) | 0.64 | 0.53            | 0.54            | 0.67                      | (0.55, 0.78) | 0.35 |
| Folic acid (mcg)           | 0.58           | 0.63            | 0.70                      | (0.62, 0.78) | 0.65 | 0.50            | 0.49            | 0.53                      | (0.38, 0.65) | 0.31 |
| With supplements           | 0.74           | 0.73            | 0.79                      | (0.72, 0.84) | 0.73 |                 |                 |                           |              |      |
| Dietary folate eqvts (mcg) | 0.46           | 0.56            | 0.64                      | (0.54, 0.72) | 0.63 | 0.39            | 0.42            | 0.51                      | (0.36, 0.63) | 0.29 |
| With supplements           | 0.73           | 0.73            | 0.79                      | (0.72, 0.84) | 0.75 |                 |                 |                           |              |      |
| Vitamin C (mg)             | 0.51           | 0.55            | 0.62                      | (0.52, 0.70) | 0.62 | 0.54            | 0.49            | 0.64                      | (0.50, 0.75) | 0.29 |
| With supplements           | 0.73           | 0.74            | 0.79                      | (0.73, 0.85) | 0.75 |                 |                 |                           |              |      |
| Vitamin D (mg)             | 0.65           | 0.65            | 0.74                      | (0.65, 0.81) | 0.63 | 0.55            | 0.57            | 0.78                      | (0.60, 0.88) | 0.24 |
| With supplements           | 0.64           | 0.60            | 0.64                      | (0.56, 0.71) | 0.74 |                 |                 |                           |              |      |
| Vitamin E (mg)             | 0.37           | 0.42            | 0.50                      | (0.38, 0.60) | 0.53 | 0.34            | 0.35            | 0.47                      | (0.33, 0.60) | 0.28 |
| With supplements           | 0.70           | 0.72            | 0.78                      | (0.71, 0.83) | 0.73 |                 |                 |                           |              |      |
| Vitamin K (mg)             | 0.56           | 0.62            | 0.74                      | (0.63, 0.82) | 0.52 | 0.44            | 0.43            | 0.62                      | (0.46, 0.73) | 0.24 |
| With supplements           | 0.55           | 0.60            | 0.70                      | (0.60, 0.79) | 0.55 |                 |                 |                           |              |      |
| Calcium (mg)               | 0.59           | 0.68            | 0.73                      | (0.66, 0.80) | 0.75 | 0.56            | 0.55            | 0.74                      | (0.55, 0.86) | 0.24 |
| With supplements           | 0.67           | 0.68            | 0.74                      | (0.66, 0.80) | 0.74 |                 |                 |                           |              |      |



**Web Table 11 (continued): Spearman correlation coefficient for comparison of daily nutrient intake from SFFQ2 with the means of two 7DDRs, and four ASA24s, unadjusted and energy-adjusted and de-attenuated results (data provided by 298 U.S. female nurses with BMI<25kg/m2 at enrollment, 2010-2012)**

| Nutrient         | SFFQ2 vs. 7DDR |                 |                           |              |      | SFFQ2 vs. ASA24 |                 |                           |              |      |
|------------------|----------------|-----------------|---------------------------|--------------|------|-----------------|-----------------|---------------------------|--------------|------|
|                  | Un-adjusted    | Energy-adjusted |                           |              | ICC  | Un-adjusted     | Energy-adjusted |                           |              | ICC  |
|                  |                | Residual method | De-attenuated (ρ & 95%CI) |              |      |                 | Residual method | De-attenuated (ρ & 95%CI) |              |      |
| Magnesium (mg)   | 0.41           | 0.68            | 0.75                      | (0.67, 0.81) | 0.71 | 0.49            | 0.59            | 0.74                      | (0.60, 0.83) | 0.33 |
| With supplements | 0.57           | 0.74            | 0.79                      | (0.72, 0.84) | 0.79 |                 |                 |                           |              |      |
| Iron (mg)        | 0.32           | 0.50            | 0.57                      | (0.46, 0.65) | 0.64 | 0.35            | 0.46            | 0.51                      | (0.35, 0.64) | 0.27 |
| With supplements | 0.34           | 0.43            | 0.51                      | (0.39, 0.61) | 0.54 |                 |                 |                           |              |      |
| Copper (mg)      | 0.35           | 0.55            | 0.62                      | (0.52, 0.70) | 0.63 | 0.35            | 0.41            | 0.52                      | (0.37, 0.64) | 0.29 |
| With supplements | 0.46           | 0.51            | 0.57                      | (0.47, 0.66) | 0.65 |                 |                 |                           |              |      |
| Zinc (mg)        | 0.34           | 0.41            | 0.49                      | (0.37, 0.59) | 0.53 | 0.39            | 0.34            | 0.53                      | (0.34, 0.68) | 0.16 |
| With supplements | 0.61           | 0.61            | 0.67                      | (0.59, 0.74) | 0.68 |                 |                 |                           |              |      |
| Phosphorus (mg)  | 0.43           | 0.67            | 0.74                      | (0.66, 0.81) | 0.67 | 0.44            | 0.55            | 0.68                      | (0.48, 0.82) | 0.22 |
| With supplements | 0.42           | 0.66            | 0.73                      | (0.65, 0.80) | 0.68 |                 |                 |                           |              |      |
| Choline (mg)     | 0.43           | 0.57            | 0.63                      | (0.54, 0.71) | 0.67 | 0.46            | 0.42            | 0.62                      | (0.41, 0.77) | 0.18 |
| With supplements | 0.40           | 0.54            | 0.60                      | (0.50, 0.68) | 0.67 |                 |                 |                           |              |      |
| Potassium (mg)   | 0.43           | 0.61            | 0.66                      | (0.57, 0.72) | 0.73 | 0.54            | 0.53            | 0.66                      | (0.54, 0.75) | 0.36 |
| With supplements | 0.43           | 0.61            | 0.66                      | (0.58, 0.73) | 0.74 |                 |                 |                           |              |      |
| Sodium (mg)      | 0.23           | 0.45            | 0.56                      | (0.43, 0.66) | 0.47 | 0.25            | 0.25            | 0.39                      | (0.20, 0.55) | 0.17 |
| Caffeine (mg)    | 0.79           | 0.75            | 0.78                      | (0.72, 0.83) | 0.86 | 0.74            | 0.73            | 0.76                      | (0.67, 0.83) | 0.53 |

Abbreviations: CI, confidence interval; ICC, intra class correlation; FA, fatty acid; Eqvts, equivalents; SFFQ, The semi-quantitative food frequency questionnaire; 7DDR, 7 Day Dietary Records; ASA24, Web-based, automated-self-administered 24-hour dietary recall.

**Web Table 12: Spearman correlation coefficient for comparison of daily nutrient intake from SFFQ2 with the means of two 7DDRs, and four ASA24s, unadjusted and energy-adjusted and de-attenuated results (data provided by 334 U.S. female nurses with BMI $\geq$ 25kg/m<sup>2</sup> at enrollment, 2010-2012)**

| Nutrient                     | SFFQ2 vs. 7DDR |                 |                                 |      | SFFQ2 vs. ASA24 |                 |                                 |      |
|------------------------------|----------------|-----------------|---------------------------------|------|-----------------|-----------------|---------------------------------|------|
|                              | Un-adjusted    | Energy-adjusted |                                 |      | Un-adjusted     | Energy-adjusted |                                 |      |
|                              |                | Residual method | De-attenuated ( $\rho$ & 95%CI) |      |                 | Residual method | De-attenuated ( $\rho$ & 95%CI) |      |
| Total energy (kcal)          | 0.31           |                 | 0.34 (0.23, 0.43)               | 0.64 | 0.31            |                 | 0.39 (0.25, 0.50)               | 0.32 |
| Total fat (g)                | 0.37           | 0.55            | 0.62 (0.53, 0.69)               | 0.64 | 0.34            | 0.51            | 0.66 (0.45, 0.80)               | 0.21 |
| Saturated fat (g)            | 0.44           | 0.55            | 0.63 (0.53, 0.70)               | 0.61 | 0.46            | 0.49            | 0.63 (0.45, 0.75)               | 0.23 |
| Polyunsaturated fat (g)      | 0.29           | 0.42            | 0.53 (0.41, 0.64)               | 0.44 | 0.20            | 0.38            | 0.69 (0.39, 0.86)               | 0.11 |
| Monounsaturated fat (g)      | 0.36           | 0.42            | 0.50 (0.39, 0.59)               | 0.57 | 0.29            | 0.38            | 0.55 (0.37, 0.68)               | 0.20 |
| Arachadonic FA (g)           | 0.38           | 0.44            | 0.53 (0.41, 0.62)               | 0.52 | 0.21            | 0.31            | 0.50 (0.32, 0.65)               | 0.16 |
| Lauric FA (g)                | 0.39           | 0.37            | 0.50 (0.36, 0.61)               | 0.38 | 0.39            | 0.30            | 0.46 (0.29, 0.60)               | 0.19 |
| Linoleic FA (g)              | 0.29           | 0.40            | 0.50 (0.37, 0.61)               | 0.45 | 0.21            | 0.38            | 0.65 (0.39, 0.82)               | 0.12 |
| Linolenic FA (g)             | 0.31           | 0.39            | 0.54 (0.39, 0.65)               | 0.37 | 0.15            | 0.22            | 0.56 (-0.18, 0.90)              | 0.04 |
| N-3 (DHA+EPA) FA (g)         | 0.50           | 0.46            | 0.61 (0.48, 0.72)               | 0.39 | 0.27            | 0.28            | 0.52 (0.22, 0.74)               | 0.08 |
| With supplements             | 0.61           | 0.58            | 0.68 (0.58, 0.75)               | 0.57 |                 |                 |                                 |      |
| Oleic FA (g)                 | 0.36           | 0.42            | 0.49 (0.38, 0.58)               | 0.57 | 0.29            | 0.37            | 0.54 (0.37, 0.68)               | 0.19 |
| Cholesterol (mg)             | 0.50           | 0.54            | 0.62 (0.53, 0.70)               | 0.58 | 0.35            | 0.38            | 0.58 (0.36, 0.74)               | 0.14 |
| Protein (g)                  | 0.32           | 0.46            | 0.52 (0.41, 0.61)               | 0.61 | 0.23            | 0.31            | 0.45 (0.30, 0.58)               | 0.23 |
| Carbohydrate (g)             | 0.41           | 0.63            | 0.67 (0.59, 0.73)               | 0.73 | 0.45            | 0.62            | 0.71 (0.58, 0.81)               | 0.33 |
| Total sugar (g)              | 0.51           | 0.64            | 0.70 (0.63, 0.77)               | 0.74 | 0.55            | 0.67            | 0.73 (0.62, 0.82)               | 0.37 |
| Fiber (g)                    | 0.47           | 0.62            | 0.66 (0.58, 0.72)               | 0.72 | 0.35            | 0.54            | 0.61 (0.47, 0.71)               | 0.30 |
| Alcohol (g)                  | 0.86           | 0.75            | 0.82 (0.77, 0.87)               | 0.73 | 0.74            | 0.64            | 0.73 (0.64, 0.81)               | 0.43 |
| Retinol activity eqvts (mcg) | 0.45           | 0.48            | 0.69 (0.52, 0.81)               | 0.32 | 0.37            | 0.42            | 0.65 (0.43, 0.80)               | 0.16 |
| With supplements             | 0.65           | 0.65            | 0.74 (0.65, 0.80)               | 0.63 |                 |                 |                                 |      |
| Alpha carotene (mcg)         | 0.52           | 0.49            | 0.68 (0.53, 0.79)               | 0.36 | 0.41            | 0.42            | 0.75 (0.42, 0.90)               | 0.11 |
| Beta carotene (mcg)          | 0.51           | 0.49            | 0.62 (0.50, 0.71)               | 0.45 | 0.42            | 0.45            | 0.76 (0.53, 0.89)               | 0.15 |
| With supplements             | 0.52           | 0.48            | 0.60 (0.48, 0.69)               | 0.47 |                 |                 |                                 |      |
| Lutein-zeaxanthin (mcg)      | 0.49           | 0.49            | 0.61 (0.49, 0.70)               | 0.48 | 0.42            | 0.45            | 0.68 v(0.39, 0.85)              | 0.13 |
| Lycopene (mcg)               | 0.42           | 0.38            | 0.61 (0.40, 0.75)               | 0.25 | 0.26            | 0.19            | 0.40 (0.13, 0.61)               | 0.08 |
| Beta cryptoxanthin (mcg)     | 0.33           | 0.34            | 0.52 (0.35, 0.66)               | 0.27 | 0.36            | 0.42            | 0.54 (0.34, 0.69)               | 0.16 |

**Web Table 12 (continued): Spearman correlation coefficient for comparison of daily nutrient intake from SFFQ2 with the means of two 7DDRs, and four ASA24s, unadjusted and energy-adjusted and de-attenuated results (data provided by 334 U.S. female nurses with BMI $\geq$ 25kg/m<sup>2</sup> at enrollment, 2010-2012)**

| Nutrient                   | SFFQ2 vs. 7DDR |                 |                                 |              | SFFQ2 vs. ASA24 |                 |                                 |      |              |      |
|----------------------------|----------------|-----------------|---------------------------------|--------------|-----------------|-----------------|---------------------------------|------|--------------|------|
|                            | Un-adjusted    | Energy-adjusted |                                 |              | Un-adjusted     | Energy-adjusted |                                 |      |              |      |
|                            |                | Residual method | De-attenuated ( $\rho$ & 95%CI) |              |                 | Residual method | De-attenuated ( $\rho$ & 95%CI) |      | ICC          |      |
| Vitamin B1 (mg)            | 0.30           | 0.47            | 0.59                            | (0.47, 0.69) | 0.44            | 0.28            | 0.39                            | 0.62 | (0.42, 0.77) | 0.15 |
| With supplements           | 0.64           | 0.66            | 0.73                            | (0.65, 0.79) | 0.69            |                 |                                 |      |              |      |
| Vitamin B2 (mg)            | 0.47           | 0.57            | 0.64                            | (0.55, 0.71) | 0.67            | 0.44            | 0.53                            | 0.67 | (0.54, 0.78) | 0.30 |
| With supplements           | 0.67           | 0.70            | 0.76                            | (0.69, 0.81) | 0.74            |                 |                                 |      |              |      |
| Vitamin B3 (mg)            | 0.35           | 0.43            | 0.52                            | (0.41, 0.62) | 0.50            | 0.24            | 0.35                            | 0.53 | (0.30, 0.71) | 0.13 |
| With supplements           | 0.64           | 0.68            | 0.77                            | (0.69, 0.83) | 0.64            |                 |                                 |      |              |      |
| Vitamin B6 (mg)            | 0.40           | 0.48            | 0.57                            | (0.46, 0.66) | 0.54            | 0.28            | 0.40                            | 0.65 | (0.40, 0.82) | 0.13 |
| With supplements           | 0.68           | 0.68            | 0.75                            | (0.68, 0.81) | 0.74            |                 |                                 |      |              |      |
| Vitamin B12 (mg)           | 0.42           | 0.43            | 0.56                            | (0.43, 0.66) | 0.42            | 0.29            | 0.30                            | 0.43 | (0.17, 0.63) | 0.11 |
| With supplements           | 0.67           | 0.65            | 0.72                            | (0.64, 0.78) | 0.71            |                 |                                 |      |              |      |
| Natural folate (mcg)       | 0.46           | 0.56            | 0.63                            | (0.54, 0.70) | 0.63            | 0.36            | 0.50                            | 0.60 | (0.46, 0.71) | 0.27 |
| Folic acid (mcg)           | 0.53           | 0.56            | 0.67                            | (0.57, 0.75) | 0.52            | 0.43            | 0.41                            | 0.63 | (0.44, 0.77) | 0.17 |
| With supplements           | 0.64           | 0.66            | 0.72                            | (0.65, 0.79) | 0.71            |                 |                                 |      |              |      |
| Dietary folate eqvts (mcg) | 0.45           | 0.54            | 0.65                            | (0.54, 0.73) | 0.50            | 0.34            | 0.39                            | 0.68 | (0.43, 0.84) | 0.12 |
| With supplements           | 0.64           | 0.68            | 0.75                            | (0.67, 0.81) | 0.72            |                 |                                 |      |              |      |
| Vitamin C (mg)             | 0.47           | 0.50            | 0.60                            | (0.49, 0.69) | 0.53            | 0.43            | 0.47                            | 0.61 | (0.46, 0.72) | 0.25 |
| With supplements           | 0.67           | 0.68            | 0.74                            | (0.67, 0.80) | 0.71            |                 |                                 |      |              |      |
| Vitamin D (mg)             | 0.55           | 0.51            | 0.62                            | (0.51, 0.71) | 0.51            | 0.47            | 0.46                            | 0.73 | (0.52, 0.86) | 0.17 |
| With supplements           | 0.62           | 0.61            | 0.67                            | (0.59, 0.73) | 0.70            |                 |                                 |      |              |      |
| Vitamin E (mg)             | 0.43           | 0.50            | 0.61                            | (0.50, 0.69) | 0.53            | 0.27            | 0.37                            | 0.54 | (0.37, 0.68) | 0.18 |
| With supplements           | 0.74           | 0.73            | 0.78                            | (0.72, 0.83) | 0.80            |                 |                                 |      |              |      |
| Vitamin K (mg)             | 0.51           | 0.53            | 0.67                            | (0.55, 0.77) | 0.44            | 0.32            | 0.38                            | 0.64 | (0.29, 0.85) | 0.11 |
| With supplements           | 0.50           | 0.52            | 0.63                            | (0.52, 0.72) | 0.49            |                 |                                 |      |              |      |
| Calcium (mg)               | 0.52           | 0.57            | 0.64                            | (0.54, 0.71) | 0.63            | 0.49            | 0.54                            | 0.62 | (0.46, 0.74) | 0.26 |
| With supplements           | 0.64           | 0.66            | 0.73                            | (0.65, 0.79) | 0.71            |                 |                                 |      |              |      |

**Web Table 12 (continued): Spearman correlation coefficient for comparison of daily nutrient intake from SFFQ2 with the means of two 7DDRs, and four ASA24s, unadjusted and energy-adjusted and de-attenuated results (data provided by 334 U.S. female nurses with BMI $\geq$ 25kg/m<sup>2</sup> at enrollment, 2010-2012)**

| Nutrient         | SFFQ2 vs. 7DDR |                 |                                 |              | SFFQ2 vs. ASA24 |                 |                                 |      |              |      |
|------------------|----------------|-----------------|---------------------------------|--------------|-----------------|-----------------|---------------------------------|------|--------------|------|
|                  | Un-adjusted    | Energy-adjusted |                                 |              | Un-adjusted     | Energy-adjusted |                                 |      |              |      |
|                  |                | Residual method | De-attenuated ( $\rho$ & 95%CI) |              |                 | Residual method | De-attenuated ( $\rho$ & 95%CI) |      | ICC          |      |
| Magnesium (mg)   | 0.44           | 0.62            | 0.68                            | (0.61, 0.74) | 0.74            | 0.31            | 0.56                            | 0.70 | (0.59, 0.79) | 0.37 |
| With supplements | 0.59           | 0.71            | 0.74                            | (0.67, 0.80) | 0.79            |                 |                                 |      |              |      |
| Iron (mg)        | 0.37           | 0.44            | 0.56                            | (0.44, 0.66) | 0.44            | 0.26            | 0.34                            | 0.64 | (0.40, 0.80) | 0.11 |
| With supplements | 0.46           | 0.52            | 0.65                            | (0.54, 0.74) | 0.46            |                 |                                 |      |              |      |
| Copper (mg)      | 0.37           | 0.47            | 0.55                            | (0.45, 0.64) | 0.57            | 0.25            | 0.38                            | 0.56 | (0.39, 0.69) | 0.20 |
| With supplements | 0.55           | 0.60            | 0.68                            | (0.59, 0.75) | 0.63            |                 |                                 |      |              |      |
| Zinc (mg)        | 0.37           | 0.44            | 0.55                            | (0.43, 0.65) | 0.46            | 0.26            | 0.26                            | 0.53 | (0.15, 0.78) | 0.07 |
| With supplements | 0.61           | 0.61            | 0.69                            | (0.60, 0.75) | 0.64            |                 |                                 |      |              |      |
| Phosphorus (mg)  | 0.39           | 0.54            | 0.60                            | (0.51, 0.67) | 0.68            | 0.33            | 0.49                            | 0.66 | (0.52, 0.77) | 0.26 |
| With supplements | 0.41           | 0.55            | 0.61                            | (0.53, 0.69) | 0.69            |                 |                                 |      |              |      |
| Choline (mg)     | 0.44           | 0.53            | 0.61                            | (0.51, 0.69) | 0.60            | 0.29            | 0.39                            | 0.58 | (0.40, 0.71) | 0.19 |
| With supplements | 0.45           | 0.53            | 0.62                            | (0.52, 0.70) | 0.58            |                 |                                 |      |              |      |
| Potassium (mg)   | 0.47           | 0.58            | 0.64                            | (0.56, 0.71) | 0.72            | 0.36            | 0.54                            | 0.60 | (0.48, 0.70) | 0.34 |
| With supplements | 0.47           | 0.58            | 0.64                            | (0.56, 0.71) | 0.72            |                 |                                 |      |              |      |
| Sodium (mg)      | 0.30           | 0.40            | 0.48                            | (0.37, 0.58) | 0.51            | 0.26            | 0.32                            | 0.41 | (0.24, 0.55) | 0.21 |
| Caffeine (mg)    | 0.76           | 0.76            | 0.81                            | (0.75, 0.85) | 0.86            | 0.72            | 0.71                            | 0.75 | (0.66, 0.82) | 0.48 |

Abbreviations: CI, confidence interval; ICC, intra class correlation; FA, fatty acid; Eqvts, equivalents; SFFQ, The semi-quantitative food frequency questionnaire; 7DDR, 7 Day Dietary Records; ASA24, Web-based, automated-self-administered 24-hour dietary recall.

**Web Table 13: Spearman correlation coefficient for comparison of daily nutrient intake from SFFQ2 with the means of two 7DDRs, and four ASA24s, unadjusted and energy-adjusted and de-attenuated results (data provided by 127 U.S. female nurses with BMI $\geq$ 30 kg/m<sup>2</sup> at enrollment, 2010-2012)**

| Nutrient                                  | SFFQ2 vs. 7DDR |                 |                                 |       | SFFQ2 vs. ASA24 |                 |                                 |      |
|-------------------------------------------|----------------|-----------------|---------------------------------|-------|-----------------|-----------------|---------------------------------|------|
|                                           | Un-adjusted    | Energy-adjusted |                                 |       | Un-adjusted     | Energy-adjusted |                                 |      |
|                                           |                | Residual method | De-attenuated ( $\rho$ & 95%CI) |       |                 | Residual method | De-attenuated ( $\rho$ & 95%CI) |      |
| Total energy (kcal)                       | 0.25           |                 | 0.29 (0.11, 0.45)               | 0.62  | 0.38            |                 | 0.46 (0.25, 0.63)               | 0.36 |
| Total fat (g)                             | 0.30           | 0.55            | 0.62 (0.46, 0.74)               | 0.63  | 0.37            | 0.43            | 0.55 (0.02, 0.84)               | 0.11 |
| Saturated fat (g)                         | 0.40           | 0.53            | 0.64 (0.45, 0.77)               | 0.52  | 0.48            | 0.39            | 0.68 (0.27, 0.88)               | 0.14 |
| Polyunsaturated fat (g)                   | 0.20           | 0.42            | 0.56 (0.33, 0.73)               | 0.37  | 0.23            | 0.35            | 0.57 (0.00, 0.87)               | 0.10 |
| Monounsaturated fat (g)                   | 0.29           | 0.46            | 0.54 (0.37, 0.67)               | 0.58  | 0.34            | 0.38            | 0.71 (-0.16, 0.97)              | 0.07 |
| Arachadonic FA (g)                        | 0.31           | 0.40            | 0.48 (0.30, 0.64)               | 0.52  | 0.09            | 0.31            | 0.44 (0.12, 0.67)               | 0.17 |
| Lauric FA (g)                             | 0.42           | 0.43            | 0.59 (0.35, 0.75)               | 0.37  | 0.47            | 0.34            | 0.53 (0.04, 0.82)               | 0.11 |
| Linoleic FA (g)                           | 0.22           | 0.39            | 0.53 (0.29, 0.70)               | 0.37  | 0.26            | 0.39            | 0.46 (-0.1, 0.80)               | 0.10 |
| Linolenic FA (g)                          | 0.20           | 0.35            | 0.51 (0.25, 0.71)               | 0.31  | 0.14            | 0.17            | 0.46 (-0.07, 0.79)              | 0.08 |
| N-3 (DHA+EPA) FA (g)                      | 0.43           | 0.40            | 0.50 (0.30, 0.66)               | 0.44  | 0.17            | 0.25            | 0.39 (0.10, 0.62)               | 0.18 |
| With supplements                          | 0.58           | 0.53            | 0.62 (0.44, 0.75)               | 0.54  |                 |                 |                                 |      |
| Oleic FA (g)                              | 0.29           | 0.46            | 0.53 (0.36, 0.67)               | 0.58  | 0.35            | 0.38            | 0.79 (-0.69, 1.00)              | 0.05 |
| Cholesterol (mg)                          | 0.44           | 0.44            | 0.52 (0.34, 0.66)               | 0.57  | 0.27            | 0.38            | 0.57 (0.24, 0.79)               | 0.16 |
| Protein (g)                               | 0.24           | 0.42            | 0.48 (0.31, 0.62)               | 0.61  | 0.23            | 0.39            | 0.46 (0.16, 0.68)               | 0.21 |
| Carbohydrate (g)                          | 0.42           | 0.65            | 0.71 (0.58, 0.80)               | 0.73  | 0.55            | 0.53            | 0.68 (0.45, 0.83)               | 0.29 |
| Total sugar (g)                           | 0.57           | 0.70            | 0.75 (0.64, 0.83)               | 0.78  | 0.74            | 0.68            | 0.72 (0.48, 0.86)               | 0.35 |
| Fiber (g)                                 | 0.43           | 0.52            | 0.59 (0.43, 0.72)               | 0.63  | 0.41            | 0.51            | 0.61 (0.38, 0.77)               | 0.33 |
| Alcohol (g)                               | 0.85           | 0.70            | 0.77 (0.65, 0.86)               | 0.70  | 0.75            | 0.55            | 0.66 (0.46, 0.80)               | 0.36 |
| Retinol activity eqvts (mcg) <sup>a</sup> | 0.41           | 0.41            | N/A                             | -0.02 | 0.44            | 0.44            | 0.84 (-0.44, 1.00)              | 0.09 |
| With supplements                          | 0.62           | 0.60            | 0.72 (0.55, 0.83)               | 0.54  |                 |                 |                                 |      |
| Alpha carotene (mcg)                      | 0.48           | 0.45            | 0.66 (0.36, 0.84)               | 0.31  | 0.38            | 0.40            | 0.71 (-0.14, 0.96)              | 0.09 |
| Beta carotene (mcg)                       | 0.48           | 0.48            | 0.71 (0.37, 0.88)               | 0.29  | 0.48            | 0.54            | 0.78 (-0.25, 0.98)              | 0.11 |
| With supplements                          | 0.48           | 0.44            | 0.61 (0.36, 0.78)               | 0.36  |                 |                 |                                 |      |
| Lutein-zeaxanthin (mcg)                   | 0.47           | 0.51            | 0.76 (0.38, 0.92)               | 0.29  | 0.49            | 0.54            | 0.47 (-0.11, 0.81)              | 0.16 |
| Lycopene (mcg)                            | 0.39           | 0.38            | 0.69 (0.11, 0.92)               | 0.17  | 0.21            | 0.19            | 0.4 (-0.19, 0.79)               | 0.06 |
| Beta cryptoxanthin (mcg)                  | 0.23           | 0.28            | 0.53 (0.07, 0.81)               | 0.16  | 0.28            | 0.41            | 0.45 (0.07, 0.72)               | 0.13 |

**Web Table 13 (continued): Spearman correlation coefficient for comparison of daily nutrient intake from SFFQ2 with the means of two 7DDRs, and four ASA24s, unadjusted and energy-adjusted and de-attenuated results (data provided by 127 U.S. female nurses with BMI $\geq$ 30 kg/m<sup>2</sup> at enrollment, 2010-2012)**

| Nutrient                   | SFFQ2 vs. 7DDR |                 |                                 |              |      | SFFQ2 vs. ASA24 |                 |                                 |               |      |
|----------------------------|----------------|-----------------|---------------------------------|--------------|------|-----------------|-----------------|---------------------------------|---------------|------|
|                            | Un-adjusted    | Energy-adjusted |                                 |              | ICC  | Un-adjusted     | Energy-adjusted |                                 |               | ICC  |
|                            |                | Residual method | De-attenuated ( $\rho$ & 95%CI) |              |      |                 | Residual method | De-attenuated ( $\rho$ & 95%CI) |               |      |
| Vitamin B1 (mg)            | 0.25           | 0.40            | 0.58                            | (0.29, 0.78) | 0.29 | 0.29            | 0.34            | 0.60                            | (0.14, 0.85)  | 0.11 |
| With supplements           | 0.60           | 0.60            | 0.67                            | (0.53, 0.78) | 0.66 |                 |                 |                                 |               |      |
| Vitamin B2 (mg)            | 0.40           | 0.48            | 0.58                            | (0.39, 0.72) | 0.52 | 0.42            | 0.48            | 0.58                            | (0.23, 0.80)  | 0.20 |
| With supplements           | 0.64           | 0.67            | 0.72                            | (0.60, 0.81) | 0.77 |                 |                 |                                 |               |      |
| Vitamin B3 (mg)            | 0.30           | 0.36            | 0.46                            | (0.25, 0.63) | 0.42 | 0.21            | 0.38            | 0.34                            | (-0.26, 0.75) | 0.09 |
| With supplements           | 0.60           | 0.62            | 0.74                            | (0.57, 0.85) | 0.53 |                 |                 |                                 |               |      |
| Vitamin B6 (mg)            | 0.35           | 0.46            | 0.58                            | (0.37, 0.73) | 0.43 | 0.27            | 0.41            | 0.59                            | (0.25, 0.80)  | 0.18 |
| With supplements           | 0.59           | 0.58            | 0.63                            | (0.49, 0.74) | 0.70 |                 |                 |                                 |               |      |
| Vitamin B12 (mg)           | 0.44           | 0.41            | 0.52                            | (0.31, 0.69) | 0.41 | 0.33            | 0.33            | 0.58                            | (0.10, 0.85)  | 0.11 |
| With supplements           | 0.56           | 0.51            | 0.55                            | (0.40, 0.67) | 0.74 |                 |                 |                                 |               |      |
| Natural folate (mcg)       | 0.38           | 0.54            | 0.63                            | (0.46, 0.75) | 0.57 | 0.38            | 0.52            | 0.79                            | (0.38, 0.93)  | 0.19 |
| Folic acid (mcg)           | 0.53           | 0.56            | 0.65                            | (0.48, 0.77) | 0.59 | 0.47            | 0.37            | 0.59                            | (0.23, 0.81)  | 0.15 |
| With supplements           | 0.61           | 0.63            | 0.69                            | (0.55, 0.79) | 0.70 |                 |                 |                                 |               |      |
| Dietary folate eqvts (mcg) | 0.39           | 0.47            | 0.59                            | (0.38, 0.74) | 0.45 | 0.34            | 0.42            | 0.55                            | (0.21, 0.78)  | 0.17 |
| With supplements           | 0.60           | 0.63            | 0.70                            | (0.56, 0.81) | 0.66 |                 |                 |                                 |               |      |
| Vitamin C (mg)             | 0.39           | 0.42            | 0.51                            | (0.32, 0.67) | 0.47 | 0.31            | 0.46            | 0.43                            | (0.14, 0.65)  | 0.24 |
| With supplements           | 0.61           | 0.59            | 0.65                            | (0.51, 0.77) | 0.69 |                 |                 |                                 |               |      |
| Vitamin D (mg)             | 0.50           | 0.44            | 0.52                            | (0.34, 0.67) | 0.53 | 0.57            | 0.56            | 0.67                            | (0.23, 0.88)  | 0.18 |
| With supplements           | 0.64           | 0.61            | 0.67                            | (0.53, 0.78) | 0.69 |                 |                 |                                 |               |      |
| Vitamin E (mg)             | 0.43           | 0.54            | 0.69                            | (0.48, 0.83) | 0.44 | 0.31            | 0.37            | 0.43                            | (0.16, 0.64)  | 0.23 |
| With supplements           | 0.78           | 0.76            | 0.80                            | (0.70, 0.87) | 0.79 |                 |                 |                                 |               |      |
| Vitamin K (mg)             | 0.43           | 0.52            | 0.77                            | (0.41, 0.92) | 0.31 | 0.43            | 0.56            | 0.39                            | (-0.39, 0.85) | 0.11 |
| With supplements           | 0.45           | 0.50            | 0.67                            | (0.43, 0.82) | 0.38 |                 |                 |                                 |               |      |
| Calcium (mg)               | 0.49           | 0.52            | 0.59                            | (0.43, 0.71) | 0.62 | 0.50            | 0.50            | 0.56                            | (0.25, 0.77)  | 0.21 |
| With supplements           | 0.64           | 0.65            | 0.71                            | (0.58, 0.81) | 0.71 |                 |                 |                                 |               |      |

**Web Table 13 (continued): Spearman correlation coefficient for comparison of daily nutrient intake from SFFQ2 with the means of two 7DDRs, and four ASA24s, unadjusted and energy-adjusted and de-attenuated results (data provided by 127 U.S. female nurses with BMI $\geq$ 30 kg/m $^2$  at enrollment, 2010-2012)**

| Nutrient         | SFFQ2 vs. 7DDR |                 |                                 |              | SFFQ2 vs. ASA24 |                 |                                 |      |               |      |
|------------------|----------------|-----------------|---------------------------------|--------------|-----------------|-----------------|---------------------------------|------|---------------|------|
|                  | Un-adjusted    | Energy-adjusted |                                 |              | Un-adjusted     | Energy-adjusted |                                 |      |               |      |
|                  |                | Residual method | De-attenuated ( $\rho$ & 95%CI) |              |                 | Residual method | De-attenuated ( $\rho$ & 95%CI) |      | ICC           |      |
| Magnesium (mg)   | 0.39           | 0.51            | 0.56                            | (0.40, 0.68) | 0.67            | 0.36            | 0.48                            | 0.48 | (0.26, 0.66)  | 0.37 |
| With supplements | 0.51           | 0.56            | 0.60                            | (0.46, 0.71) | 0.72            |                 |                                 |      |               |      |
| Iron (mg)        | 0.29           | 0.33            | 0.45                            | (0.21, 0.64) | 0.35            | 0.23            | 0.27                            | 0.48 | (-0.44, 0.91) | 0.05 |
| With supplements | 0.40           | 0.49            | 0.60                            | (0.40, 0.74) | 0.48            |                 |                                 |      |               |      |
| Copper (mg)      | 0.30           | 0.38            | 0.48                            | (0.28, 0.65) | 0.45            | 0.27            | 0.41                            | 0.49 | (0.23, 0.68)  | 0.25 |
| With supplements | 0.57           | 0.58            | 0.68                            | (0.52, 0.80) | 0.58            |                 |                                 |      |               |      |
| Zinc (mg)        | 0.44           | 0.48            | 0.60                            | (0.40, 0.73) | 0.48            | 0.31            | 0.25                            | 0.68 | (-0.67, 0.99) | 0.04 |
| With supplements | 0.62           | 0.58            | 0.66                            | (0.51, 0.78) | 0.63            |                 |                                 |      |               |      |
| Phosphorus (mg)  | 0.36           | 0.50            | 0.55                            | (0.39, 0.68) | 0.67            | 0.38            | 0.53                            | 0.65 | (0.34, 0.84)  | 0.22 |
| With supplements | 0.39           | 0.53            | 0.58                            | (0.43, 0.70) | 0.70            |                 |                                 |      |               |      |
| Choline (mg)     | 0.42           | 0.51            | 0.58                            | (0.41, 0.70) | 0.63            | 0.26            | 0.39                            | 0.48 | (0.16, 0.70)  | 0.20 |
| With supplements | 0.42           | 0.51            | 0.58                            | (0.41, 0.71) | 0.61            |                 |                                 |      |               |      |
| Potassium (mg)   | 0.44           | 0.51            | 0.57                            | (0.40, 0.69) | 0.65            | 0.38            | 0.43                            | 0.43 | (0.19, 0.62)  | 0.32 |
| With supplements | 0.46           | 0.53            | 0.59                            | (0.43, 0.71) | 0.65            |                 |                                 |      |               |      |
| Sodium (mg)      | 0.16           | 0.27            | 0.34                            | (0.12, 0.52) | 0.43            | 0.31            | 0.29                            | 0.39 | (0.13, 0.60)  | 0.24 |
| Caffeine (mg)    | 0.73           | 0.75            | 0.78                            | (0.68, 0.85) | 0.86            | 0.75            | 0.72                            | 0.76 | (0.55, 0.87)  | 0.40 |

Abbreviations: CI, confidence interval; ICC, intra class correlation; FA, fatty acid; Eqvts, equivalents; SFFQ, The semi-quantitative food frequency questionnaire; 7DDR, 7 Day Dietary Records; ASA24, Web-based, automated-self-administered 24-hour dietary recall.

<sup>a</sup> The ICC for Retinol activity equivalent in 7DDR was -0.02, thus de-attenuated Spearman correlation coefficient was not available.

**Web Figure 1. Bland-Altman plots comparing energy-adjusted nutrient intakes assessed by SFFQ2 and 7DDR.** The middle line represents the mean difference between the two assessment methods; the upper and lower lines are the 95% limits of agreement (Data Provided by 632 U.S. Female Nurses Aged 45-80 Years, 2010-2012)

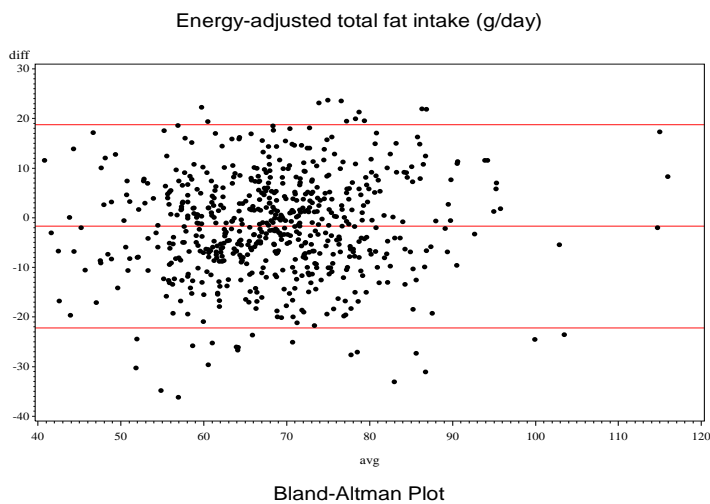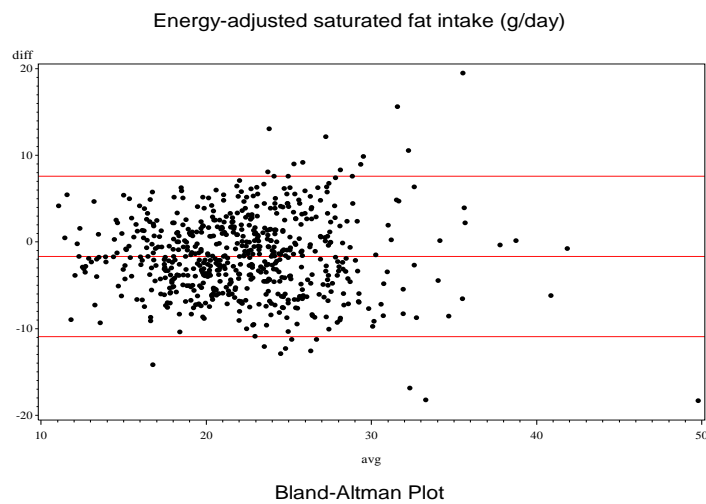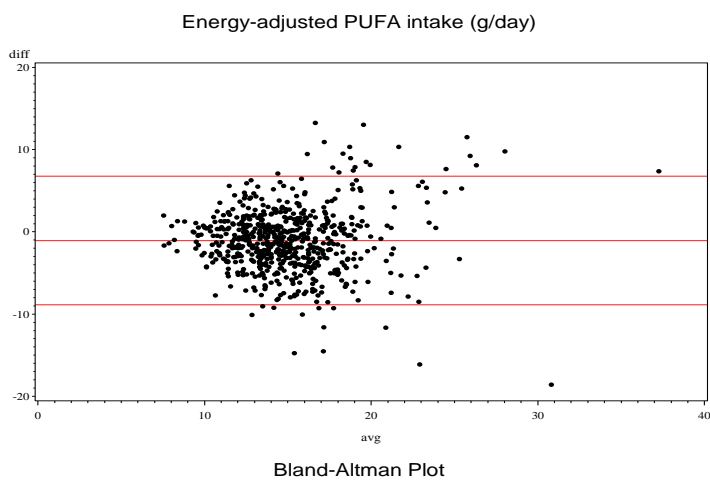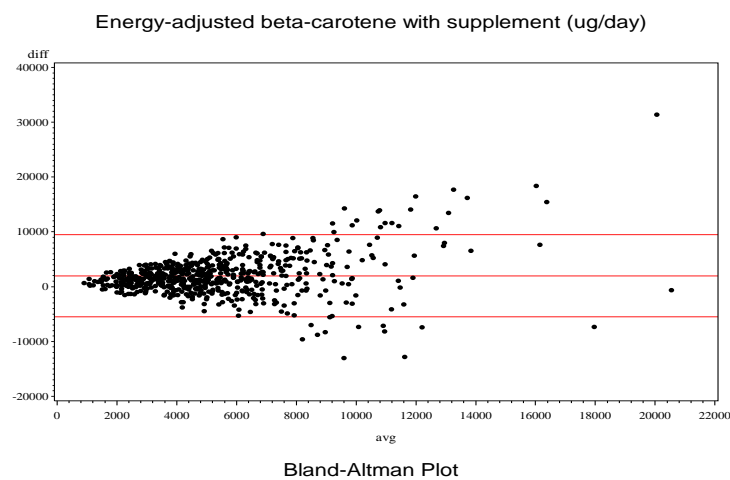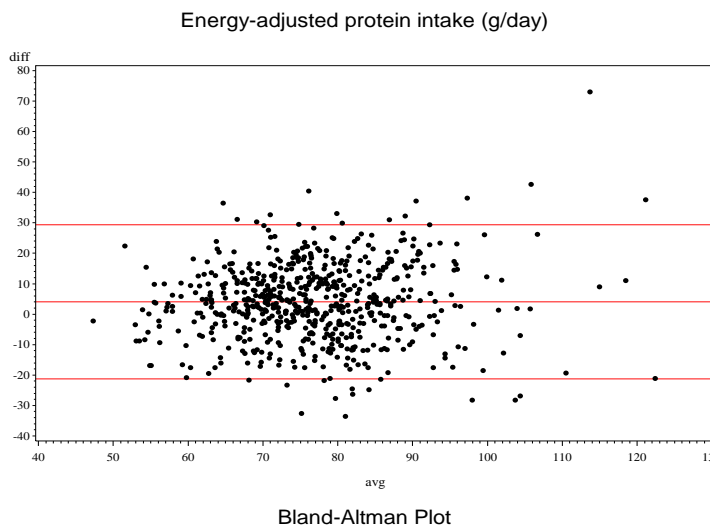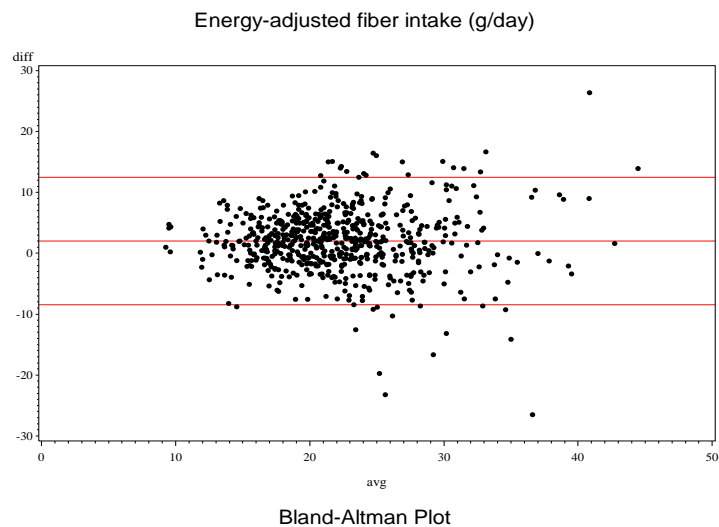



**Web Table 14: Regression coefficients of predicting the average daily nutrient intakes of two 7DDRs, and four ASA24s using daily nutrient intakes from each SFFQ, unadjusted and energy-adjusted using energy density and residual method (data provided by 632 U.S. female nurses aged 45-80 years, 2010-2012)**

| Nutrient                     | SFFQ2 vs.   |                 |             |                 | SFFQ1 vs.   |                 |             |                 | WebFFQ vs.  |                 |             |                 |
|------------------------------|-------------|-----------------|-------------|-----------------|-------------|-----------------|-------------|-----------------|-------------|-----------------|-------------|-----------------|
|                              | 7DDR        |                 | ASA24       |                 | 7DDR        |                 | ASA24       |                 | 7DDR        |                 | ASA24       |                 |
|                              | Un-adjusted | Residual method |
| Total energy (kcal)          | 0.20        |                 | 0.27        |                 | 0.21        |                 | 0.30        |                 | 0.19        |                 | 0.25        |                 |
| Total fat (g)                | 0.29        | 0.55            | 0.35        | 0.57            | 0.31        | 0.53            | 0.36        | 0.55            | 0.25        | 0.51            | 0.31        | 0.53            |
| Saturated fat (g)            | 0.39        | 0.58            | 0.47        | 0.57            | 0.39        | 0.59            | 0.45        | 0.57            | 0.34        | 0.61            | 0.40        | 0.58            |
| Polyunsaturated fat (g)      | 0.24        | 0.45            | 0.27        | 0.52            | 0.30        | 0.46            | 0.35        | 0.53            | 0.23        | 0.46            | 0.29        | 0.50            |
| Monounsaturated fat (g)      | 0.29        | 0.41            | 0.32        | 0.41            | 0.31        | 0.40            | 0.33        | 0.41            | 0.26        | 0.39            | 0.30        | 0.38            |
| Arachadonic FA (g)           | 0.34        | 0.40            | 0.44        | 0.54            | 0.37        | 0.56            | 0.33        | 0.57            | 0.34        | 0.44            | 0.34        | 0.53            |
| Lauric FA (g)                | 0.34        | 0.32            | 0.37        | 0.33            | 0.41        | 0.33            | 0.40        | 0.38            | 0.36        | 0.33            | 0.35        | 0.38            |
| Linoleic FA (g)              | 0.25        | 0.44            | 0.28        | 0.53            | 0.50        | 0.47            | 0.78        | 0.53            | 0.46        | 0.46            | 0.79        | 0.50            |
| Linolenic FA (g)             | 0.29        | 0.42            | 0.26        | 0.33            | 0.56        | 0.41            | 0.71        | 0.32            | 0.52        | 0.43            | 0.65        | 0.36            |
| N-3 (DHA+EPA) FA (g)         | 0.50        | 0.54            | 0.33        | 0.41            | 0.49        | 0.52            | 0.57        | 0.39            | 0.48        | 0.42            | 0.58        | 0.30            |
| With supplements             | 0.66        | 0.69            | 0.65        | 0.65            | 0.53        | 0.56            |             |                 |             |                 |             |                 |
| Oleic FA (g)                 | 0.29        | 0.40            | 0.31        | 0.40            | 0.45        | 0.39            | 0.39        | 0.40            | 0.48        | 0.38            | 0.60        | 0.37            |
| Cholesterol (mg)             | 0.44        | 0.54            | 0.50        | 0.57            | 0.51        | 0.62            | 0.44        | 0.45            | 0.42        | 0.54            | 0.43        | 0.52            |
| Protein (g)                  | 0.25        | 0.48            | 0.29        | 0.48            | 0.28        | 0.47            | 0.35        | 0.46            | 0.24        | 0.48            | 0.29        | 0.49            |
| Carbohydrates (g)            | 0.34        | 0.75            | 0.43        | 0.78            | 0.35        | 0.76            | 0.44        | 0.72            | 0.31        | 0.70            | 0.38        | 0.73            |
| Total sugar (g)              | 0.48        | 0.73            | 0.57        | 0.76            | 0.50        | 0.75            | 0.58        | 0.74            | 0.46        | 0.73            | 0.52        | 0.76            |
| Fiber (g)                    | 0.41        | 0.70            | 0.45        | 0.67            | 0.46        | 0.74            | 0.52        | 0.72            | 0.40        | 0.70            | 0.45        | 0.70            |
| Alcohol (g)                  | 0.49        | 0.48            | 0.58        | 0.57            | 0.28        | 0.48            | 0.30        | 0.57            | 0.27        | 0.47            | 0.31        | 0.57            |
| Retinol activity eqvts (mcg) | 0.43        | 0.49            | 0.50        | 0.54            | 0.34        | 0.48            | 0.37        | 0.54            | 0.30        | 0.46            | 0.27        | 0.48            |
| With supplements             | 0.63        | 0.67            | 0.62        | 0.64            | 0.60        | 0.65            |             |                 |             |                 |             |                 |
| Alpha carotene (mcg)         | 0.53        | 0.55            | 0.85        | 0.87            | 0.45        | 0.49            | 0.60        | 0.78            | 0.41        | 0.47            | 0.53        | 0.86            |
| Beta carotene (mcg)          | 0.57        | 0.63            | 0.71        | 0.78            | 0.46        | 0.60            | 0.66        | 0.78            | 0.47        | 0.58            | 0.61        | 0.72            |
| With supplements             | 0.58        | 0.63            | 0.55        | 0.57            | 0.52        | 0.58            |             |                 |             |                 |             |                 |
| Lutein-zeaxanthin (mcg)      | 0.54        | 0.60            | 0.64        | 0.72            | 0.43        | 0.57            | 0.60        | 0.69            | 0.38        | 0.55            | 0.54        | 0.64            |
| Lycopene (mcg)               | 0.48        | 0.48            | 0.66        | 0.49            | 0.20        | 0.44            | 0.18        | 0.29            | 0.18        | 0.49            | 0.20        | 0.47            |
| Beta cryptoxanthin (mcg)     | 0.41        | 0.48            | 0.90        | 1.03            | 0.31        | 0.46            | 0.35        | 0.94            | 0.23        | 0.44            | 0.29        | 0.93            |

**Web Table 14 (continued): Regression coefficients of predicting the average daily nutrient intakes of two 7DDRs, and four ASA24s using daily nutrient intakes from each SFFQ, unadjusted and energy-adjusted (data provided by 632 U.S. female nurses aged 45-80 years, 2010-2012)**

| Nutrient                   | SFFQ2 vs.       |                    |                 |                    | SFFQ1 vs.       |                    |                 |                    | WebFFQ vs.      |                    |                 |                    |
|----------------------------|-----------------|--------------------|-----------------|--------------------|-----------------|--------------------|-----------------|--------------------|-----------------|--------------------|-----------------|--------------------|
|                            | 7DDR            |                    | ASA24           |                    | 7DDR            |                    | ASA24           |                    | 7DDR            |                    | ASA24           |                    |
|                            | Un-<br>adjusted | Residual<br>method |
| Vitamin B1 (mg)            | 0.29            | 0.47               | 0.33            | 0.50               | 0.33            | 0.42               | 0.28            | 0.36               | 0.29            | 0.57               | 0.28            | 0.53               |
| With supplements           | 0.72            | 0.73               | 0.68            | 0.68               | 0.68            | 0.70               |                 |                    |                 |                    |                 |                    |
| Vitamin B2 (mg)            | 0.44            | 0.55               | 0.45            | 0.54               | 0.43            | 0.54               | 0.53            | 0.52               | 0.41            | 0.58               | 0.49            | 0.58               |
| With supplements           | 0.60            | 0.60               | 0.56            | 0.56               | 0.56            | 0.57               |                 |                    |                 |                    |                 |                    |
| Vitamin B3 (mg)            | 0.31            | 0.52               | 0.32            | 0.52               | 0.31            | 0.49               | 0.33            | 0.48               | 0.26            | 0.52               | 0.29            | 0.41               |
| With supplements           | 0.77            | 0.83               | 0.77            | 0.80               | 0.74            | 0.80               |                 |                    |                 |                    |                 |                    |
| Vitamin B6 (mg)            | 0.36            | 0.59               | 0.37            | 0.54               | 0.36            | 0.53               | 0.42            | 0.46               | 0.31            | 0.63               | 0.37            | 0.60               |
| With supplements           | 0.55            | 0.55               | 0.52            | 0.52               | 0.51            | 0.51               |                 |                    |                 |                    |                 |                    |
| Vitamin B12 (mg)           | 0.43            | 0.49               | 0.39            | 0.39               | 0.40            | 0.44               | 0.39            | 0.36               | 0.42            | 0.52               | 0.37            | 0.38               |
| With supplements           | 0.70            | 0.70               | 0.69            | 0.69               | 0.68            | 0.68               |                 |                    |                 |                    |                 |                    |
| Natural folate (mcg)       | 0.42            | 0.61               | 0.39            | 0.60               | 0.42            | 0.56               | 0.40            | 0.55               | 0.38            | 0.58               | 0.37            | 0.55               |
| Folic acid (mcg)           | 0.79            | 0.84               | 0.81            | 0.80               | 0.44            | 0.76               | 0.45            | 0.88               | 0.40            | 0.88               | 0.44            | 0.88               |
| With supplements           | 0.66            | 0.67               | 0.62            | 0.63               | 0.71            | 0.73               |                 |                    |                 |                    |                 |                    |
| Dietary folate eqvts (mcg) | 0.42            | 0.57               | 0.36            | 0.43               | 0.35            | 0.49               | 0.38            | 0.37               | 0.32            | 0.53               | 0.36            | 0.46               |
| With supplements           | 0.71            | 0.75               | 0.68            | 0.70               | 0.69            | 0.76               |                 |                    |                 |                    |                 |                    |
| Vitamin C (mg)             | 0.50            | 0.61               | 0.67            | 0.80               | 0.49            | 0.56               | 0.67            | 0.78               | 0.45            | 0.55               | 0.64            | 0.76               |
| With supplements           | 0.81            | 0.85               | 0.79            | 0.82               | 0.78            | 0.81               |                 |                    |                 |                    |                 |                    |
| Vitamin D (mg)             | 0.57            | 0.61               | 0.66            | 0.72               | 0.54            | 0.56               | 0.68            | 0.69               | 0.52            | 0.58               | 0.61            | 0.66               |
| With supplements           | 0.89            | 0.90               | 0.82            | 0.81               | 0.83            | 0.84               |                 |                    |                 |                    |                 |                    |
| Vitamin E (mg)             | 0.36            | 0.48               | 0.31            | 0.37               | 0.39            | 0.48               | 0.33            | 0.35               | 0.29            | 0.43               | 0.26            | 0.33               |
| With supplements           | 0.71            | 0.73               | 0.72            | 0.74               | 0.66            | 0.68               |                 |                    |                 |                    |                 |                    |
| Vitamin K (mg)             | 0.47            | 0.53               | 0.44            | 0.52               | 0.47            | 0.53               | 0.45            | 0.53               | 0.44            | 0.50               | 0.39            | 0.47               |
| With supplements           | 0.49            | 0.56               | 0.50            | 0.56               | 0.45            | 0.51               |                 |                    |                 |                    |                 |                    |
| Calcium (mg)               | 0.45            | 0.58               | 0.54            | 0.65               | 0.34            | 0.55               | 0.30            | 0.65               | 0.34            | 0.54               | 0.29            | 0.58               |
| With supplements           | 0.66            | 0.71               | 0.66            | 0.71               | 0.61            | 0.68               |                 |                    |                 |                    |                 |                    |

**Web Table 14 (continued): Regression coefficients of predicting the average daily nutrient intakes of two 7DDRs, and four ASA24s using daily nutrient intakes from each SFFQ, unadjusted and energy-adjusted (data provided by 632 U.S. female nurses aged 45-80 years, 2010-2012)**

| Nutrient         | SFFQ2 vs.       |                    |                 |                    | SFFQ1 vs.       |                    |                 |                    | WebFFQ vs.      |                    |                 |                    |
|------------------|-----------------|--------------------|-----------------|--------------------|-----------------|--------------------|-----------------|--------------------|-----------------|--------------------|-----------------|--------------------|
|                  | 7DDR            |                    | ASA24           |                    | 7DDR            |                    | ASA24           |                    | 7DDR            |                    | ASA24           |                    |
|                  | Un-<br>adjusted | Residual<br>method |
| Magnesium (mg)   | 0.37            | 0.84               | 0.39            | 0.86               | 0.50            | 0.77               | 0.38            | 0.83               | 0.39            | 0.78               | 0.28            | 0.76               |
| With supplements | 0.63            | 0.96               | 0.61            | 0.90               | 0.57            | 0.90               |                 |                    |                 |                    |                 |                    |
| Iron (mg)        | 0.33            | 0.58               | 0.31            | 0.46               | 0.36            | 0.55               | 0.41            | 0.39               | 0.32            | 0.67               | 0.38            | 0.49               |
| With supplements | 0.41            | 0.51               | 0.44            | 0.50               | 0.36            | 0.43               |                 |                    |                 |                    |                 |                    |
| Copper (mg)      | 0.33            | 0.55               | 0.30            | 0.47               | 0.41            | 0.54               | 0.45            | 0.45               | 0.37            | 0.56               | 0.42            | 0.44               |
| With supplements | 0.49            | 0.54               | 0.49            | 0.55               | 0.43            | 0.49               |                 |                    |                 |                    |                 |                    |
| Zinc (mg)        | 0.34            | 0.52               | 0.34            | 0.39               | 0.33            | 0.45               | 0.35            | 0.38               | 0.30            | 0.53               | 0.29            | 0.38               |
| With supplements | 0.62            | 0.65               | 0.58            | 0.62               | 0.54            | 0.59               |                 |                    |                 |                    |                 |                    |
| Phosphorus (mg)  | 0.32            | 0.62               | 0.35            | 0.61               | 0.48            | 0.53               | 0.51            | 0.58               | 0.37            | 0.57               | 0.45            | 0.58               |
| With supplements | 0.32            | 0.62               | 0.33            | 0.54               | 0.28            | 0.56               |                 |                    |                 |                    |                 |                    |
| Choline (mg)     | 0.37            | 0.60               | 0.36            | 0.54               | 0.45            | 0.61               | 0.67            | 0.48               | 0.43            | 0.59               | 0.60            | 0.48               |
| With supplements | 0.36            | 0.56               | 0.42            | 0.62               | 0.36            | 0.59               |                 |                    |                 |                    |                 |                    |
| Potassium (mg)   | 0.39            | 0.77               | 0.42            | 0.75               | 0.33            | 0.68               | 0.42            | 0.68               | 0.32            | 0.66               | 0.39            | 0.66               |
| With supplements | 0.39            | 0.77               | 0.42            | 0.69               | 0.35            | 0.67               |                 |                    |                 |                    |                 |                    |
| Sodium (mg)      | 0.22            | 0.42               | 0.24            | 0.30               | 0.71            | 0.37               | 0.83            | 0.25               | 0.78            | 0.40               | 0.84            | 0.33               |
| Caffeine (mg)    | 0.80            | 0.81               | 1.46            | 1.46               | 0.35            | 0.90               | 0.34            | 1.58               | 0.31            | 0.62               | 0.32            | 1.12               |

Abbreviations: CI, confidence interval; ICC, intra class correlation; FA, fatty acid; Eqvts, equivalents; SFFQ, The semi-quantitative food frequency questionnaire; WebFFQ: web-based version of the SFFQ; 7DDR, 7 Day Dietary Records; ASA24, Web-based, automated-self-administered 24-hour dietary recall.

**Web Table 15: Nutrient distribution, Spearman correlation coefficient and regression coefficients for comparing the additional nutrients that were available for the 7DDR and SFFQ (data provided by 632 U.S. female nurses aged 45-80 years, 2010-2012)**

| Nutrient                            | Mean (SD)    |                | ICC             |       | Spearman correlation coefficient |                 |                                 |              | Regression coefficient |                 |
|-------------------------------------|--------------|----------------|-----------------|-------|----------------------------------|-----------------|---------------------------------|--------------|------------------------|-----------------|
|                                     | FFQ2         | Averaged 7DDRs | Energy-adjusted |       | Un-adjusted                      | Energy-adjusted |                                 |              | Un-adjusted            | Energy-adjusted |
|                                     |              |                | FFQs            | 7DDRs |                                  | Residual method | De-attenuated ( $\rho$ & 95%CI) |              |                        |                 |
| Animal Protein (g)                  | 52.9 (19.3)  | 47.8 (14.5)    | 0.60            | 0.63  | 0.42                             | 0.50            | 0.56                            | (0.48, 0.62) | 0.37                   | 0.47            |
| Vegetable Protein (g)               | 27.7 (9.9)   | 24.8 (6.8)     | 0.64            | 0.63  | 0.39                             | 0.59            | 0.66                            | (0.59, 0.71) | 0.31                   | 0.57            |
| Total Trans-Fatty Acids (g)         | 1.9 (0.8)    | 2.2 (0.9)      | 0.69            | 0.44  | 0.39                             | 0.45            | 0.57                            | (0.48, 0.64) | 0.45                   | 0.65            |
| 18:2 Trans-Fatty Acids (g)          | 0.3 (0.1)    | 0.3 (0.1)      | 0.67            | 0.46  | 0.39                             | 0.44            | 0.56                            | (0.47, 0.63) | 0.39                   | 0.53            |
| 18:1 Trans-Fatty Acids (g)          | 1.6 (0.6)    | 1.8 (0.8)      | 0.67            | 0.42  | 0.38                             | 0.43            | 0.56                            | (0.47, 0.64) | 0.47                   | 0.68            |
| 16:1 Trans-Fatty Acids (g)          | 0.08 (0.04)  | 0.04 (0.03)    | 0.68            | 0.47  | 0.39                             | 0.41            | 0.51                            | (0.43, 0.59) | 0.40                   | 0.43            |
| CLA 18:2 Linoleic, c9,t11 (g)       | 0.08 (0.04)  | 0.10 (0.04)    | 0.71            | 0.57  | 0.52                             | 0.56            | 0.65                            | (0.58, 0.71) | 0.52                   | 0.58            |
| Total Sugars (g)                    | 100.2 (42.8) | 91.8 (32.2)    | 0.78            | 0.75  | 0.53                             | 0.68            | 0.74                            | (0.69, 0.79) | 0.48                   | 0.73            |
| Fructose (g)                        | 21.2 (10.2)  | 17.5 (8.4)     | 0.69            | 0.65  | 0.55                             | 0.60            | 0.67                            | (0.61, 0.72) | 0.54                   | 0.71            |
| Glucose (g)                         | 20.7 (10.0)  | 18.3 (7.4)     | 0.68            | 0.62  | 0.49                             | 0.55            | 0.63                            | (0.57, 0.69) | 0.41                   | 0.56            |
| Lactose (g)                         | 16.4 (12.2)  | 12.7 (8.7)     | 0.74            | 0.78  | 0.70                             | 0.71            | 0.77                            | (0.72, 0.81) | 0.62                   | 0.64            |
| Maltose (g)                         | 2.3 (1.1)    | 2.7 (1.5)      | 0.54            | 0.43  | 0.17                             | 0.20            | 0.25                            | (0.15, 0.34) | 0.21                   | 0.27            |
| Sucrose (g)                         | 39.6 (21.9)  | 40.3 (18.5)    | 0.72            | 0.68  | 0.45                             | 0.58            | 0.65                            | (0.59, 0.70) | 0.46                   | 0.66            |
| Starch (g)                          | 79.4 (30.0)  | 82.1 (23.1)    | 0.62            | 0.60  | 0.43                             | 0.57            | 0.66                            | (0.59, 0.71) | 0.39                   | 0.61            |
| Synthetic $\alpha$ -Tocopherol (mg) | 1.6 (3.3)    | 2.5 (4.8)      | 0.54            | 0.41  | 0.37                             | 0.34            | 0.44                            | (0.35, 0.52) | 0.33                   | 0.33            |
| Beta-Tocopherol (mg)                | 0.3 (0.1)    | 0.4 (0.2)      | 0.54            | 0.45  | 0.31                             | 0.36            | 0.45                            | (0.36, 0.53) | 0.34                   | 0.49            |
| Delta-Tocopherol (mg)               | 2.2 (1.0)    | 2.5 (1.0)      | 0.58            | 0.42  | 0.31                             | 0.43            | 0.55                            | (0.46, 0.63) | 0.36                   | 0.56            |
| Gama-Tocopherol (mg)                | 10.1 (4.3)   | 11.3 (3.9)     | 0.60            | 0.40  | 0.25                             | 0.38            | 0.50                            | (0.41, 0.59) | 0.23                   | 0.41            |
| Pantothenic Acid (mg)               | 6.0 (2.1)    | 5.5 (2.0)      | 0.65            | 0.66  | 0.50                             | 0.58            | 0.65                            | (0.59, 0.70) | 0.50                   | 0.66            |
| With supplements                    | 18.8 (50.9)  | 15.3 (23.4)    | 0.69            | 0.72  | 0.69                             | 0.71            | 0.78                            | (0.73, 0.82) | 0.62                   | 0.64            |
| Tryptophan (g)                      | 0.9 (0.3)    | 0.8 (0.2)      | 0.63            | 0.59  | 0.31                             | 0.47            | 0.54                            | (0.47, 0.60) | 0.24                   | 0.50            |
| Threonine (g)                       | 3.0 (0.9)    | 2.7 (0.6)      | 0.60            | 0.61  | 0.31                             | 0.46            | 0.52                            | (0.45, 0.59) | 0.24                   | 0.48            |
| Isoleucine (g)                      | 3.7 (1.1)    | 3.2 (0.8)      | 0.61            | 0.61  | 0.33                             | 0.47            | 0.53                            | (0.46, 0.60) | 0.26                   | 0.49            |
| Leucine (g)                         | 6.4 (2.0)    | 5.6 (1.3)      | 0.62            | 0.62  | 0.34                             | 0.49            | 0.55                            | (0.48, 0.62) | 0.26                   | 0.49            |
| Lysine (g)                          | 5.6 (1.8)    | 4.8 (1.2)      | 0.59            | 0.61  | 0.35                             | 0.46            | 0.52                            | (0.44, 0.58) | 0.29                   | 0.49            |

**Web Table 15 (continued): Nutrient distribution, Spearman correlation coefficient and regression coefficients for comparing the additional nutrients that were available for the 7DDR and SFFQ (data provided by 632 U.S. female nurses aged 45-80 years, 2010-2012)**

| Nutrient                    | Mean (SD)    |                | ICC             |       | Un-adjusted | Spearman correlation coefficient |                                 |              | Regression coefficient |                 |
|-----------------------------|--------------|----------------|-----------------|-------|-------------|----------------------------------|---------------------------------|--------------|------------------------|-----------------|
|                             | FFQ2         | Averaged 7DDRs | Energy-adjusted |       |             | Residual method                  | Energy-adjusted                 |              | Un-adjusted            | Energy-adjusted |
|                             |              |                | FFQs            | 7DDRs |             |                                  | De-attenuated ( $\rho$ & 95%CI) |              |                        |                 |
| Methionine (g)              | 1.8 (0.6)    | 1.6 (0.4)      | 0.60            | 0.62  | 0.34        | 0.46                             | 0.52                            | (0.44, 0.58) | 0.27                   | 0.47            |
| Cystine (g)                 | 1.2 (0.4)    | 1.1 (0.3)      | 0.70            | 0.67  | 0.45        | 0.60                             | 0.67                            | (0.61, 0.72) | 0.35                   | 0.56            |
| Phenylalanine (g)           | 3.6 (1.1)    | 3.2 (0.7)      | 0.63            | 0.62  | 0.33        | 0.50                             | 0.57                            | (0.50, 0.63) | 0.24                   | 0.50            |
| Tyrosine (g)                | 2.8 (0.9)    | 2.5 (0.6)      | 0.63            | 0.63  | 0.34        | 0.50                             | 0.55                            | (0.48, 0.62) | 0.26                   | 0.49            |
| Valine (g)                  | 4.2 (1.3)    | 3.7 (0.8)      | 0.61            | 0.62  | 0.34        | 0.49                             | 0.55                            | (0.47, 0.61) | 0.26                   | 0.50            |
| Arginine (g)                | 4.6 (1.4)    | 3.9 (1.0)      | 0.60            | 0.60  | 0.30        | 0.45                             | 0.51                            | (0.43, 0.57) | 0.24                   | 0.48            |
| Histidine (g)               | 2.2 (0.7)    | 1.9 (0.5)      | 0.61            | 0.59  | 0.32        | 0.46                             | 0.52                            | (0.44, 0.59) | 0.25                   | 0.47            |
| Alanine (g)                 | 3.9 (1.2)    | 3.3 (0.8)      | 0.60            | 0.60  | 0.32        | 0.46                             | 0.52                            | (0.44, 0.58) | 0.26                   | 0.47            |
| Aspartic Acid (g)           | 7.5 (2.3)    | 6.4 (1.5)      | 0.61            | 0.60  | 0.32        | 0.46                             | 0.52                            | (0.45, 0.59) | 0.25                   | 0.50            |
| Glutamic Acid (g)           | 15.4 (4.5)   | 14 (2.9)       | 0.64            | 0.61  | 0.33        | 0.49                             | 0.56                            | (0.49, 0.62) | 0.24                   | 0.48            |
| Glycine (g)                 | 3.4 (1.1)    | 3.0 (0.8)      | 0.59            | 0.59  | 0.31        | 0.44                             | 0.51                            | (0.43, 0.57) | 0.25                   | 0.47            |
| Proline (g)                 | 5.1 (1.6)    | 4.8 (1.1)      | 0.65            | 0.62  | 0.38        | 0.55                             | 0.63                            | (0.57, 0.69) | 0.28                   | 0.52            |
| Serine (g)                  | 3.8 (1.1)    | 3.3 (0.7)      | 0.63            | 0.64  | 0.34        | 0.50                             | 0.57                            | (0.50, 0.63) | 0.25                   | 0.50            |
| Genistein (mg)              | 1.5 (3.1)    | 1.2 (2.6)      | 0.62            | 0.43  | 0.47        | 0.50                             | 0.64                            | (0.55, 0.71) | 0.70                   | 0.75            |
| Glycitein (mg)              | 0.4 (0.8)    | 0.2 (0.4)      | 0.62            | 0.37  | 0.53        | 0.52                             | 0.70                            | (0.60, 0.78) | 0.73                   | 0.78            |
| Aspartame (mg)              | 0.08 (0.14)  | 0.07 (0.10)    | 0.79            | 0.74  | 0.77        | 0.70                             | 0.76                            | (0.71, 0.81) | 0.69                   | 0.68            |
| Sucralose (g) <sup>a</sup>  | 1.7 (3.9)    | 0.2 (0.6)      | 0.81            | 0.64  | 0.27        | 0.32                             | 0.35                            | (0.27, 0.42) | 0.32                   | 0.32            |
| Betaine (mg)                | 106.2 (49.2) | 148.3 (61.1)   | 0.55            | 0.49  | 0.41        | 0.40                             | 0.49                            | (0.41, 0.57) | 0.38                   | 0.45            |
| With supplements            | 106.5 (49.8) | 151.1 (75.7)   | 0.56            | 0.50  | 0.39        | 0.39                             | 0.47                            | (0.38, 0.54) | 0.37                   | 0.43            |
| Glycemic Index              | 49.9 (4.1)   | 51.7 (4.1)     | 0.68            | 0.67  | 0.48        | 0.48                             | 0.52                            | (0.45, 0.58) | 0.49                   | 0.48            |
| Glycemic Load               | 110 (38.8)   | 108.4 (28.5)   | 0.72            | 0.71  | 0.41        | 0.63                             | 0.69                            | (0.64, 0.74) | 0.36                   | 0.67            |
| Selenium, supplements (mcg) | 21.7 (57.4)  | 24.1 (40.7)    | 0.59            | 0.66  | 0.62        | 0.45                             | 0.50                            | (0.42, 0.56) | 0.69                   | 0.68            |
| Manganese (mg)              | 4.2 (1.5)    | 3.9 (1.4)      | 0.68            | 0.70  | 0.50        | 0.63                             | 0.68                            | (0.62, 0.73) | 0.47                   | 0.75            |
| With supplements            | 5.1 (2.2)    | 5.3 (2.4)      | 0.63            | 0.68  | 0.54        | 0.61                             | 0.68                            | (0.62, 0.73) | 0.54                   | 0.66            |

**Web Table 15 (continued): Nutrient distribution, Spearman correlation coefficient and regression coefficients for comparing the additional nutrients that were available for the 7DDR and SFFQ (data provided by 632 U.S. female nurses aged 45-80 years, 2010-2012)**

| Nutrient                               | Mean (sd)      |                | ICC             |       | Un-adjusted | Spearman correlation coefficient |                 |              | Regression coefficient |                 |
|----------------------------------------|----------------|----------------|-----------------|-------|-------------|----------------------------------|-----------------|--------------|------------------------|-----------------|
|                                        | FFQ2           | Averaged 7DDRs | Energy-adjusted |       |             | Residual method                  | Energy-adjusted |              | Un-adjusted            | Energy-adjusted |
|                                        |                |                | FFQs            | 7DDRs |             |                                  | (ρ & 95%CI)     |              |                        |                 |
| Oxalic acid, Oxalate (mg)              | 250.6 (161.9)  | 209.4 (101.8)  | 0.66            | 0.51  | 0.48        | 0.50                             | 0.60            | (0.52, 0.67) | 0.39                   | 0.44            |
| Phytic acid, Phytate (mg) <sup>b</sup> | 1078.4 (407.8) | 661.4 (265.1)  | 0.61            | 0.65  | 0.43        | 0.55                             | 0.62            | (0.56, 0.68) | 0.44                   | 0.75            |
| Iodine, supplements (mcg)              | 63.5 (78.5)    | 72.2 (291.2)   | 0.29            | 0.69  | 0.62        | 0.40                             | 0.43            | (0.37, 0.50) | 0.69                   | 0.69            |

Abbreviations: SD, standard deviation; CI, confidence interval; ICC, intra class correlation; SFFQ, The semi-quantitative food frequency questionnaire; 7DDR, 7 Day Dietary Records.

<sup>a</sup> Higher sucrose intake assessed by SFFQ was mainly due to very high consumptions of diet soda; and among different types of diet soda, the diet Mountain Dew has high contents of sucrose.

<sup>b</sup> Phytic acid database values in FFQ and 7DDR are based upon different methods.
